# Supplementary material for: Assessing the accuracy of simplified coupled cluster methods for electronic excited states in f0 actinide compounds
Source: Royal Society of Chemistry journal article supplement (doi:10.1039/c9cp03678d), 2019-01-01
Supplement: c9cp03678d1.pdf [file c9cp03678d1.pdf]

---

# Assessing the accuracy of simplified Coupled Cluster methods for electronic excited states in f0 actinide compounds

Artur Nowak, Paweł Tecmer,<sup>\*</sup> and Katharina Boguslawski<sup>†</sup>

Institute of Physics, Faculty of Physics, Astronomy, and Informatics, Nicolaus Copernicus University in Torun,  
Grudziadzka 5, 87-100 Torun, Poland  
E-mail: <sup>\*</sup>ptecmer@fizyka.umk.pl; <sup>†</sup>k.boguslawski@fizyka.umk.pl

**Supplementary Information**

For ThO and ThS, we have used the all-electron atomic natural orbital relativistic correlation consistent (ANO-RCC) basis sets<sup>1</sup> available in the OpenMolcas program package version 17.0,<sup>2</sup> optimized specifically for the 2-nd order Douglas–Kroll–Hess (DKH2) Hamiltonian.<sup>3–5</sup> For all remaining molecules, we have employed the double- $\zeta$  correlation consistent basis sets of Peterson<sup>6</sup> for all heavy elements (cc-pVDZ-DK3), optimized specifically for the DKH3 Hamiltonian,<sup>5,7,8</sup> and Dunning’s aug-cc-pVDZ basis set for all light elements.<sup>9</sup> Scalar relativistic effects were accounted for by the DKH2 Hamiltonian (ThO and ThS) and the DKH3 Hamiltonian ( $\text{UO}_2^{2+}$  and its isoelectronic series), respectively.

## S1 $\text{UO}_2^{2+}$

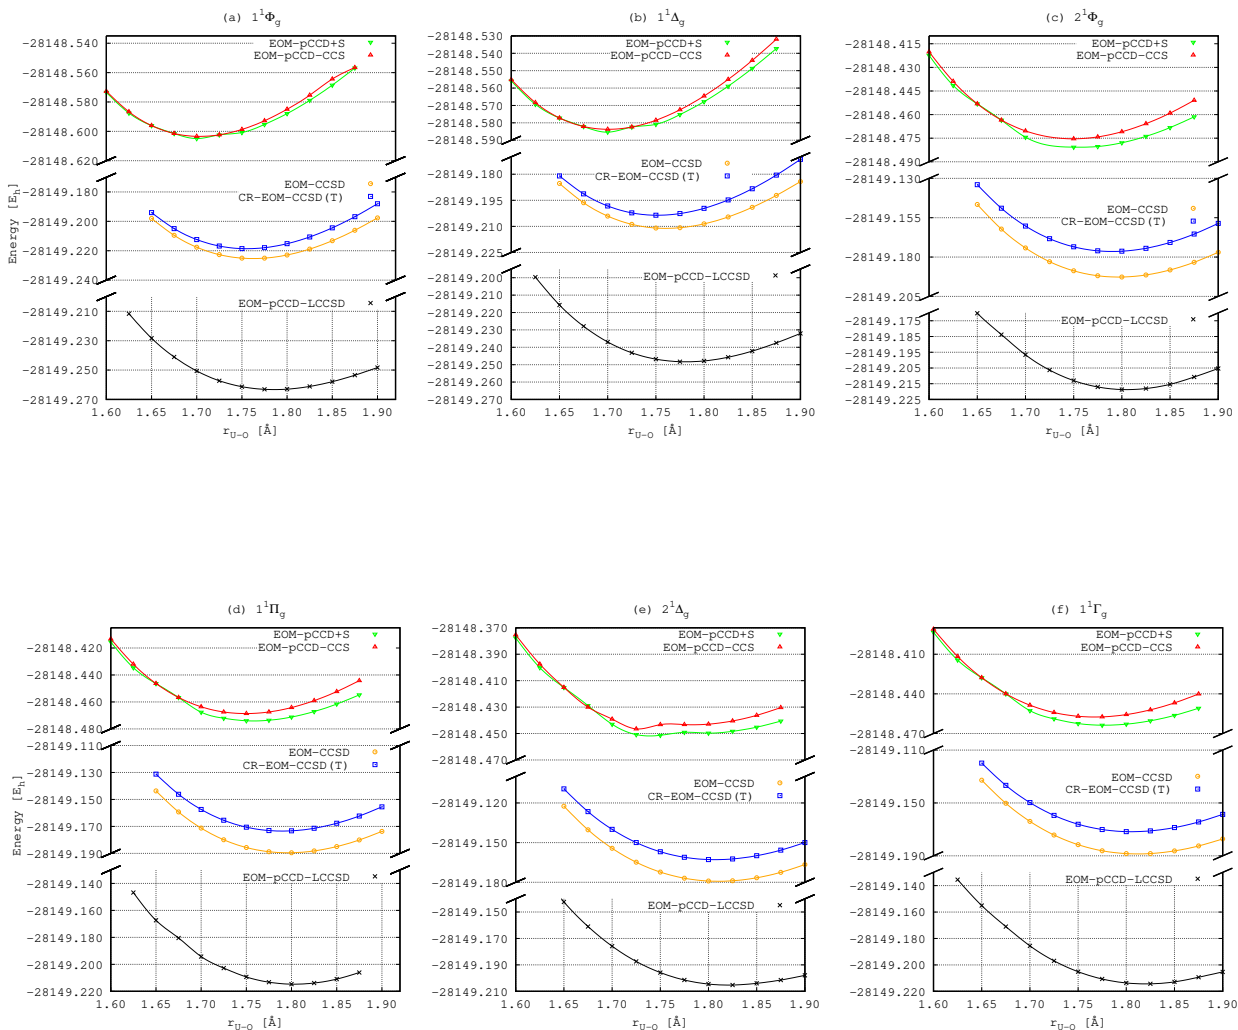

Figure S1: Potential energy surfaces of the lowest-lying excited states of  $\text{UO}_2^{2+}$  determined for various EOM-CC methods. In all pCCD-based methods, no symmetry constraints were imposed ( $C_1$  symmetry), while in all conventional CC methods  $D_{2h}$  symmetry was imposed.

Table S1: Total electronic energies [ $E_h$ ] of  $\text{UO}_2^{2+}$  for different states and various CC methods. In all pCCD-based methods, no symmetry constraints were imposed ( $C_1$  symmetry), while in all conventional CC methods  $D_{2h}$  symmetry was imposed.

| Distance[Å] | pCCD         | pCCD-CCS     | pCCD-LCCSD     | CCSD         |                |
|-------------|--------------|--------------|----------------|--------------|----------------|
|             |              |              | $X^1\Sigma^+$  |              |                |
| 1.600       | -28148.76552 | -28148.76555 |                |              |                |
| 1.625       | -28148.77497 | -28148.77500 | -28149.37791   |              |                |
| 1.650       | -28148.77995 | -28148.77999 | -28149.38782   | -28149.35231 |                |
| 1.675       | -28148.78106 | -28148.78111 | -28149.39399   | -28149.35606 |                |
| 1.700       | -28148.77882 | -28148.77888 | -28149.39709   | -28149.35641 |                |
| 1.725       | -28148.77371 | -28148.77378 | -28149.39755   | -28149.35379 |                |
| 1.750       | -28148.76611 | -28148.76621 | -28149.39563   | -28149.34858 |                |
| 1.775       | -28148.75639 | -28148.75651 | -28149.39175   | -28149.34112 |                |
| 1.800       | -28148.74484 | -28148.74499 | -28149.38624   | -28149.33170 |                |
| 1.825       | -28148.73173 | -28148.73193 | -28149.37930   | -28149.32060 |                |
| 1.850       | -28148.71729 | -28148.71754 | -28149.37126   | -28149.30804 |                |
| 1.875       | -28148.70172 | -28148.70203 | -28149.36231   | -28149.29424 |                |
| 1.900       |              | -28148.68560 | -28149.35333   | -28149.27942 |                |
| Distance[Å] | EOM-pCCD+S   | EOM-pCCD-CCS | EOM-pCCD-LCCSD | EOM-CCSD     | CR-EOM-CCSD(T) |
|             |              |              | $1^1\Phi_g$    |              |                |
| 1.600       | -28148.57269 | -28148.57347 |                |              |                |
| 1.625       | -28148.58668 | -28148.58759 | -28149.21163   |              |                |
| 1.650       | -28148.59607 | -28148.59611 | -28149.22829   | -28149.19797 | -28149.19402   |
| 1.675       | -28148.60147 | -28148.60152 | -28149.24107   | -28149.20950 | -28149.20492   |
| 1.700       | -28148.60342 | -28148.60492 | -28149.25060   | -28149.21760 | -28149.21238   |
| 1.725       | -28148.60237 | -28148.60244 | -28149.25726   | -28149.22266 | -28149.21680   |
| 1.750       | -28148.59871 | -28148.60082 | -28149.26130   | -28149.22503 | -28149.21855   |
| 1.775       | -28148.59280 | -28148.59531 | -28149.26311   | -28149.22501 | -28149.21791   |
| 1.800       | -28148.58495 | -28148.58792 | -28149.26299   | -28149.22288 | -28149.21519   |
| 1.825       | -28148.57541 | -28148.57893 | -28149.26114   | -28149.21886 | -28149.21061   |
| 1.850       | -28148.56438 | -28148.56853 | -28149.25790   | -28149.21318 | -28149.20442   |
| 1.875       | -28148.55657 | -28148.55689 | -28149.25346   | -28149.20605 | -28149.19682   |
| 1.900       |              |              | -28149.24830   | -28149.19764 | -28149.18803   |
|             |              |              | $1^1\Delta_g$  |              |                |
| 1.600       | -28148.55511 | -28148.55592 |                |              |                |
| 1.625       | -28148.56837 | -28148.56934 | -28149.19965   |              |                |
| 1.650       | -28148.57718 | -28148.57722 | -28149.21568   | -28149.18534 | -28149.18099   |
| 1.675       | -28148.58212 | -28148.58217 | -28149.22791   | -28149.19639 | -28149.19131   |
| 1.700       | -28148.58371 | -28148.58535 | -28149.23694   | -28149.20409 | -28149.19825   |
| 1.725       | -28148.58239 | -28148.58246 | -28149.24317   | -28149.20883 | -28149.20224   |
| 1.750       | -28148.57853 | -28148.58086 | -28149.24682   | -28149.21095 | -28149.20360   |
| 1.775       | -28148.57249 | -28148.57526 | -28149.24828   | -28149.21077 | -28149.20264   |
| 1.800       | -28148.56457 | -28148.56786 | -28149.24785   | -28149.20855 | -28149.19962   |
| 1.825       | -28148.55504 | -28148.55893 | -28149.24571   | -28149.20457 | -28149.19479   |
| 1.850       | -28148.54410 | -28148.54868 | -28149.24219   | -28149.19904 | -28149.18835   |
| 1.875       | -28148.53192 | -28148.53730 | -28149.23748   | -28149.19219 | -28149.18051   |
| 1.900       |              |              | -28149.23204   | -28149.18424 | -28149.17147   |
|             |              |              | $1^1\Gamma_g$  |              |                |
| 1.600       | -28148.39107 | -28148.39344 |                |              |                |
| 1.625       | -28148.41170 | -28148.41444 | -28149.13551   |              |                |
| 1.650       | -28148.42780 | -28148.42784 | -28149.15510   | -28149.13276 | -28149.11986   |
| 1.675       | -28148.43992 | -28148.43997 | -28149.17101   | -28149.15023 | -28149.13666   |
| 1.700       | -28148.44856 | -28148.45273 | -28149.18560   | -28149.16393 | -28149.14970   |
| 1.725       | -28148.45413 | -28148.45420 | -28149.19692   | -28149.17426 | -28149.15940   |
| 1.750       | -28148.45697 | -28148.46247 | -28149.20515   | -28149.18158 | -28149.16090   |
| 1.775       | -28148.45739 | -28148.46372 | -28149.21066   | -28149.18617 | -28149.17010   |
| 1.800       | -28148.45569 | -28148.46293 | -28149.21367   | -28149.18833 | -28149.17169   |
| 1.825       | -28148.45209 | -28148.46039 | -28149.21432   | -28149.18829 | -28149.17112   |
| 1.850       | -28148.44683 | -28148.45630 | -28149.21285   | -28149.18628 | -28149.16862   |
| 1.875       | -28148.44009 | -28148.45088 | -28149.20933   | -28149.18252 | -28149.16439   |
| 1.900       |              |              | -28149.20532   | -28149.17722 | -28149.15863   |
|             |              |              | $2^1\Delta_g$  |              |                |
| 1.600       | -28148.37532 | -28148.37767 |                |              |                |
| 1.625       | -28148.39748 | -28148.40017 | -28149.11951   | -28149.12248 | -28149.10936   |
| 1.650       | -28148.41511 | -28148.41515 | -28149.14239   | -28149.14030 | -28149.12658   |
| 1.675       | -28148.43007 | -28148.42885 | -28149.16098   | -28149.15429 | -28149.13998   |
| 1.700       | -28148.43911 | -28148.44298 | -28149.17586   | -28149.16483 | -28149.14996   |
| 1.725       | -28148.44650 | -28148.44657 | -28149.19581   | -28149.17227 | -28149.15689   |
| 1.750       | -28148.45134 | -28148.45616 | -28149.20143   | -28149.17692 | -28149.16109   |
| 1.775       | -28148.44322 | -28148.44908 | -28149.20451   | -28149.17904 | -28149.16282   |
| 1.800       | -28148.44291 | -28148.44970 | -28149.20524   | -28149.17886 | -28149.16234   |
| 1.825       | -28148.44049 | -28148.44831 | -28149.20394   | -28149.17660 | -28149.15989   |
| 1.850       | -28148.43624 | -28148.44519 | -28149.20145   | -28149.17245 | -28149.15569   |
| 1.875       | -28148.43040 | -28148.44058 | -28149.19791   | -28149.16661 | -28149.14995   |
| 1.900       |              |              |                |              |                |
|             |              |              | $2^1\Phi_g$    |              |                |
| 1.600       | -28148.42012 | -28148.42237 |                |              |                |
| 1.625       | -28148.43889 | -28148.44150 | -28149.15261   |              |                |
| 1.650       | -28148.45316 | -28148.45320 | -28149.17019   | -28149.14656 | -28149.13402   |
| 1.675       | -28148.46349 | -28148.46354 | -28149.18376   | -28149.16223 | -28149.14898   |
| 1.700       | -28148.47037 | -28148.47438 | -28149.19664   | -28149.17423 | -28149.16029   |
| 1.725       | -28148.47423 | -28148.47431 | -28149.20633   | -28149.18294 | -28149.16834   |
| 1.750       | -28148.47540 | -28148.48071 | -28149.21302   | -28149.18873 | -28149.17349   |
| 1.775       | -28148.47420 | -28148.48031 | -28149.21706   | -28149.19188 | -28149.17604   |
| 1.800       | -28148.47091 | -28148.47793 | -28149.21870   | -28149.19269 | -28149.17628   |
| 1.825       | -28148.46580 | -28148.47385 | -28149.21806   | -28149.19138 | -28149.17443   |
| 1.850       | -28148.45907 | -28148.46828 | -28149.21538   | -28149.18818 | -28149.17074   |
| 1.875       | -28148.45094 | -28148.46144 | -28149.21073   | -28149.18331 | -28149.16539   |
| 1.900       |              |              | -28149.20535   | -28149.17696 | -28149.15860   |
|             |              |              | $1^1\Pi_g$     |              |                |
| 1.600       | -28148.41321 | -28148.41547 |                |              |                |
| 1.625       | -28148.43202 | -28148.43464 | -28149.14676   |              |                |
| 1.650       | -28148.44632 | -28148.44636 | -28149.16733   | -28149.14364 | -28149.13121   |
| 1.675       | -28148.45668 | -28148.45672 | -28149.18044   | -28149.15927 | -28149.14615   |
| 1.700       | -28148.46358 | -28148.46760 | -28149.19423   | -28149.17123 | -28149.15742   |
| 1.725       | -28148.46745 | -28148.46752 | -28149.20277   | -28149.17990 | -28149.16544   |
| 1.750       | -28148.46862 | -28148.47396 | -28149.20933   | -28149.18564 | -28149.17055   |
| 1.775       | -28148.46743 | -28148.47357 | -28149.21321   | -28149.18876 | -28149.17306   |
| 1.800       | -28148.46415 | -28148.47121 | -28149.21468   | -28149.18952 | -28149.17326   |
| 1.825       | -28148.45904 | -28148.46713 | -28149.21384   | -28149.18817 | -28149.17138   |
| 1.850       | -28148.45232 | -28148.46158 | -28149.21094   | -28149.18494 | -28149.16765   |
| 1.875       | -28148.44420 | -28148.45475 | -28149.20604   | -28149.18004 | -28149.16229   |
| 1.900       |              |              | -28149.20029   | -28149.17369 | -28149.15548   |

Table S2: Excitation energies [eV] of  $\text{UO}_2^{2+}$  for different states and various CC methods. In all pCCD-based methods, no symmetry constraints were imposed ( $C_1$  symmetry), while in all conventional CC methods  $D_{2h}$  symmetry was imposed.

| Distance[Å]   | EOM-pCCD+S | EOM-pCCD-CCS | EOM-pCCD-LCCSD | EOM-CCSD | CR-EOM-CCSD(T) |
|---------------|------------|--------------|----------------|----------|----------------|
| $1^1\Phi_g$   |            |              |                |          |                |
| 1.600         | 5.25       | 5.23         |                |          |                |
| 1.625         | 5.12       | 5.10         | 4.52           |          |                |
| 1.650         | 5.00       | 5.00         | 4.34           | 4.20     | 4.31           |
| 1.675         | 4.89       | 4.89         | 4.16           | 3.99     | 4.11           |
| 1.700         | 4.77       | 4.73         | 3.99           | 3.78     | 3.92           |
| 1.725         | 4.66       | 4.66         | 3.82           | 3.57     | 3.73           |
| 1.750         | 4.56       | 4.50         | 3.66           | 3.36     | 3.54           |
| 1.775         | 4.45       | 4.39         | 3.50           | 3.16     | 3.35           |
| 1.800         | 4.35       | 4.27         | 3.35           | 2.96     | 3.17           |
| 1.825         | 4.25       | 4.16         | 3.22           | 2.77     | 2.99           |
| 1.850         | 4.16       | 4.05         | 3.08           | 2.58     | 2.82           |
| 1.875         | 3.95       | 3.95         | 2.96           | 2.40     | 2.65           |
| 1.900         |            |              | 2.86           | 2.23     | 2.49           |
| $1^1\Delta_g$ |            |              |                |          |                |
| 1.600         | 5.73       | 5.70         |                |          |                |
| 1.625         | 5.62       | 5.60         | 4.85           |          |                |
| 1.650         | 5.52       | 5.52         | 4.68           | 4.54     | 4.66           |
| 1.675         | 5.41       | 5.41         | 4.52           | 4.34     | 4.48           |
| 1.700         | 5.31       | 5.27         | 4.36           | 4.14     | 4.30           |
| 1.725         | 5.21       | 5.21         | 4.20           | 3.94     | 4.12           |
| 1.750         | 5.10       | 5.04         | 4.05           | 3.75     | 3.95           |
| 1.775         | 5.00       | 4.93         | 3.90           | 3.55     | 3.77           |
| 1.800         | 4.91       | 4.82         | 3.77           | 3.35     | 3.59           |
| 1.825         | 4.81       | 4.71         | 3.64           | 3.16     | 3.42           |
| 1.850         | 4.71       | 4.59         | 3.51           | 2.97     | 3.26           |
| 1.875         | 4.62       | 4.48         | 3.40           | 2.78     | 3.09           |
| 1.900         |            |              | 3.30           | 2.59     | 2.94           |
| $1^1\Gamma_g$ |            |              |                |          |                |
| 1.600         | 10.19      | 10.13        |                |          |                |
| 1.625         | 9.89       | 9.81         | 6.60           |          |                |
| 1.650         | 9.58       | 9.58         | 6.33           | 5.97     | 6.33           |
| 1.675         | 9.28       | 9.28         | 6.07           | 5.60     | 5.97           |
| 1.700         | 8.99       | 8.88         | 5.75           | 5.24     | 5.62           |
| 1.725         | 8.70       | 8.70         | 5.46           | 4.89     | 5.29           |
| 1.750         | 8.41       | 8.27         | 5.18           | 4.54     | 4.97           |
| 1.775         | 8.14       | 7.97         | 4.93           | 4.22     | 4.65           |
| 1.800         | 7.87       | 7.68         | 4.70           | 3.90     | 4.35           |
| 1.825         | 7.61       | 7.39         | 4.49           | 3.60     | 4.07           |
| 1.850         | 7.36       | 7.11         | 4.31           | 3.31     | 3.79           |
| 1.875         | 7.12       | 6.83         | 4.16           | 3.04     | 3.53           |
| 1.900         |            |              | 4.03           | 2.78     | 3.29           |
| $2^1\Delta_g$ |            |              |                |          |                |
| 1.600         | 10.62      | 10.55        |                |          |                |
| 1.625         | 10.27      | 10.20        | 7.03           |          |                |
| 1.650         | 9.93       | 9.93         | 6.68           | 6.25     | 6.61           |
| 1.675         | 9.55       | 9.59         | 6.34           | 5.87     | 6.24           |
| 1.700         | 9.24       | 9.14         | 6.02           | 5.50     | 5.89           |
| 1.725         | 8.90       | 8.90         | 5.72           | 5.14     | 5.55           |
| 1.750         | 8.57       | 8.44         | 5.44           | 4.80     | 5.22           |
| 1.775         | 8.52       | 8.37         | 5.18           | 4.47     | 4.90           |
| 1.800         | 8.22       | 8.04         | 4.95           | 4.15     | 4.60           |
| 1.825         | 7.93       | 7.72         | 4.74           | 3.86     | 4.31           |
| 1.850         | 7.65       | 7.41         | 4.55           | 3.58     | 4.03           |
| 1.875         | 7.38       | 7.11         | 4.38           | 3.31     | 3.77           |
| 1.900         |            |              | 4.23           | 3.07     | 3.52           |
| $2^1\Phi_g$   |            |              |                |          |                |
| 1.600         | 9.40       | 9.34         |                |          |                |
| 1.625         | 9.15       | 9.08         | 6.13           |          |                |
| 1.650         | 8.89       | 8.89         | 5.92           | 5.60     | 5.94           |
| 1.675         | 8.64       | 8.64         | 5.72           | 5.27     | 5.63           |
| 1.700         | 8.39       | 8.29         | 5.45           | 4.96     | 5.34           |
| 1.725         | 8.15       | 8.15         | 5.20           | 4.65     | 5.05           |
| 1.750         | 7.91       | 7.77         | 4.97           | 4.35     | 4.76           |
| 1.775         | 7.68       | 7.52         | 4.75           | 4.06     | 4.49           |
| 1.800         | 7.45       | 7.27         | 4.56           | 3.78     | 4.23           |
| 1.825         | 7.24       | 7.02         | 4.39           | 3.52     | 3.98           |
| 1.850         | 7.03       | 6.78         | 4.24           | 3.26     | 3.74           |
| 1.875         | 6.82       | 6.55         | 4.12           | 3.02     | 3.51           |
| 1.900         |            |              | 4.03           | 2.79     | 3.29           |
| $1^1\Pi_g$    |            |              |                |          |                |
| 1.600         | 9.59       | 9.53         |                |          |                |
| 1.625         | 9.33       | 9.26         | 6.29           |          |                |
| 1.650         | 9.08       | 9.08         | 6.00           | 5.68     | 6.02           |
| 1.675         | 8.83       | 8.83         | 5.81           | 5.35     | 5.71           |
| 1.700         | 8.58       | 8.47         | 5.52           | 5.04     | 5.41           |
| 1.725         | 8.33       | 8.33         | 5.30           | 4.73     | 5.13           |
| 1.750         | 8.10       | 7.95         | 5.07           | 4.43     | 4.84           |
| 1.775         | 7.86       | 7.70         | 4.86           | 4.15     | 4.57           |
| 1.800         | 7.64       | 7.45         | 4.67           | 3.87     | 4.31           |
| 1.825         | 7.42       | 7.21         | 4.50           | 3.60     | 4.06           |
| 1.850         | 7.21       | 6.97         | 4.36           | 3.35     | 3.82           |
| 1.875         | 7.01       | 6.73         | 4.25           | 3.11     | 3.59           |
| 1.900         |            |              | 4.16           | 2.88     | 3.37           |

## S2 NUN

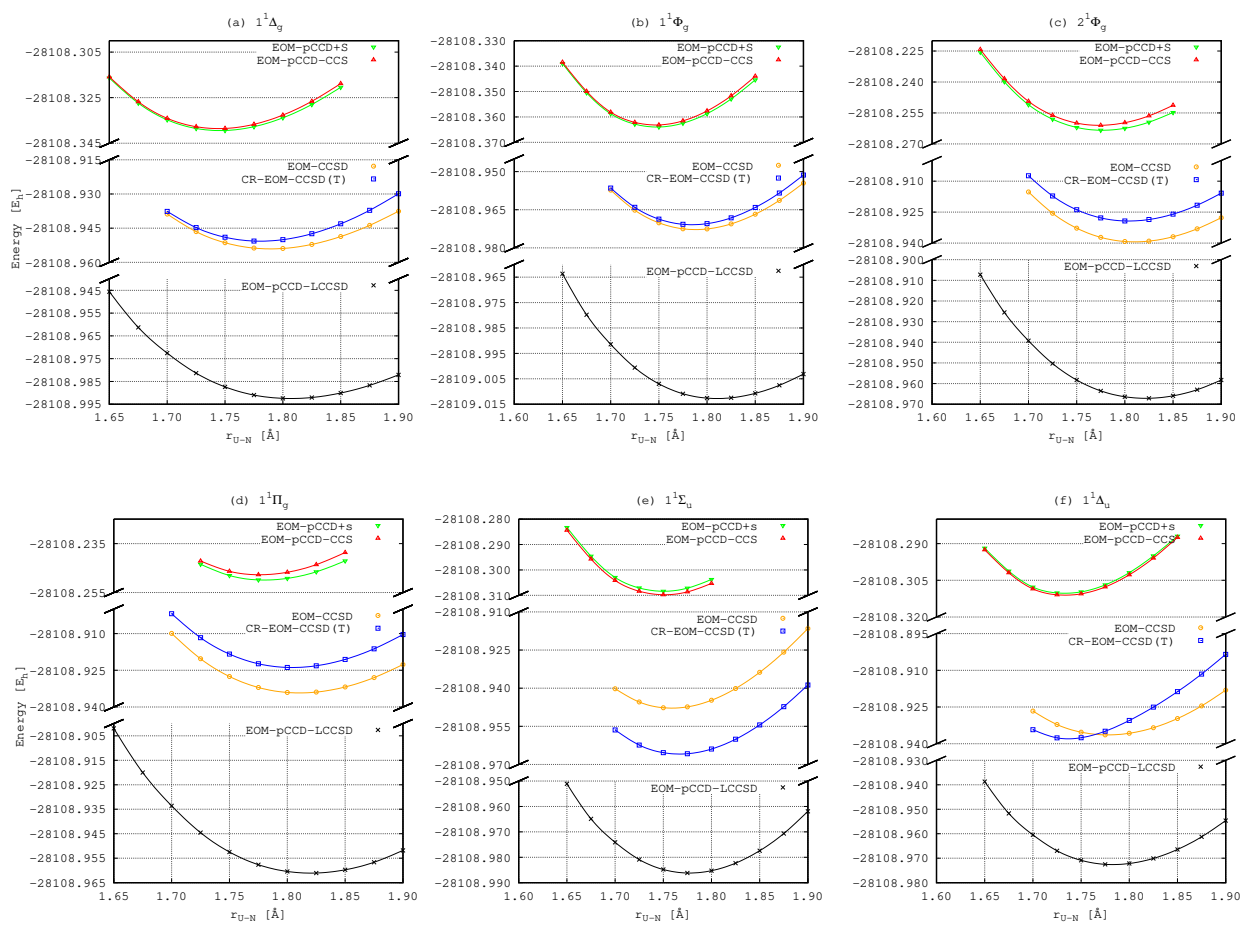

Figure S2: Potential energy surfaces of the lowest-lying excited states of NUN determined for various EOM-CC methods. In all pCCD-based methods, no symmetry constraints were imposed ( $C_1$  symmetry), while in all conventional CC methods  $D_{2h}$  symmetry was imposed.

Table S3: Total electronic energies [ $E_h$ ] of NUN for different states and various CC methods. In all pCCD-based methods, no symmetry constraints were imposed ( $C_1$  symmetry), while in all conventional CC methods  $D_{2h}$  symmetry was imposed.

| Distance[Å] | pCCD         | pCCD-CCS     | pCCD-LCCSD     | CCSD         |                |
|-------------|--------------|--------------|----------------|--------------|----------------|
|             |              |              | $X^1\Sigma^+$  |              |                |
| 1.650       | -28108.47864 | -28108.47864 | -28109.08992   | -28109.05393 |                |
| 1.675       | -28108.48546 | -28108.48546 | -28109.10019   | -28109.06409 |                |
| 1.700       | -28108.48865 | -28108.48865 | -28109.10594   | -28109.06787 |                |
| 1.725       | -28108.48848 | -28108.48849 | -28109.10970   | -28109.06964 |                |
| 1.750       | -28108.48541 | -28108.48542 | -28109.11075   | -28109.06851 |                |
| 1.775       | -28108.47983 | -28108.47984 | -28109.10949   | -28109.06483 |                |
| 1.800       | -28108.47208 | -28108.47209 | -28109.10622   | -28109.05895 |                |
| 1.825       | -28108.46248 | -28108.46248 | -28109.10131   | -28109.05113 |                |
| 1.850       | -28108.45131 | -28108.45131 | -28109.09496   | -28109.04163 |                |
| 1.875       |              |              | -28109.08739   | -28109.03068 |                |
| 1.900       |              |              | -28109.07869   | -28109.01848 |                |
| Distance[Å] | EOM-pCCD+S   | EOM-pCCD-CCS | EOM-pCCD-LCCSD | EOM-CCSD     | CR-EOM-CCSD(T) |
|             |              |              | $1^1\Delta_g$  |              |                |
| 1.650       | -28108.31639 | -28108.31587 | -28108.94563   |              |                |
| 1.675       | -28108.32738 | -28108.32679 | -28108.96126   |              |                |
| 1.700       | -28108.33474 | -28108.33408 | -28108.97256   | -28108.93881 | -28108.93763   |
| 1.725       | -28108.33852 | -28108.33775 | -28108.98135   | -28108.94652 | -28108.94475   |
| 1.750       | -28108.33941 | -28108.33851 | -28108.98737   | -28108.95139 | -28108.94898   |
| 1.775       | -28108.33775 | -28108.33670 | -28108.99097   | -28108.95374 | -28108.95065   |
| 1.800       | -28108.33386 | -28108.33264 | -28108.99241   | -28108.95390 | -28108.95005   |
| 1.825       | -28108.32801 | -28108.32660 | -28108.99205   | -28108.95213 | -28108.94745   |
| 1.850       | -28108.32046 | -28108.31883 | -28108.99007   | -28108.94868 | -28108.94307   |
| 1.875       |              |              | -28108.98671   | -28108.94376 | -28108.93715   |
| 1.900       |              |              | -28108.98211   | -28108.93757 | -28108.92990   |
|             |              |              | $1^1\Phi_g$    |              |                |
| 1.650       | -28108.33899 | -28108.33849 | -28108.96367   |              |                |
| 1.675       | -28108.35049 | -28108.34993 | -28108.97979   |              |                |
| 1.700       | -28108.35874 | -28108.35812 | -28108.99141   | -28108.95727 | -28108.95646   |
| 1.725       | -28108.36284 | -28108.36213 | -28109.00060   | -28108.96518 | -28108.96404   |
| 1.750       | -28108.36396 | -28108.36315 | -28109.00697   | -28108.97014 | -28108.96868   |
| 1.775       | -28108.36248 | -28108.36155 | -28109.01088   | -28108.97250 | -28108.97073   |
| 1.800       | -28108.35870 | -28108.35763 | -28109.01260   | -28108.97256 | -28108.97047   |
| 1.825       | -28108.35292 | -28108.35169 | -28109.01247   | -28108.97056 | -28108.96818   |
| 1.850       | -28108.34541 | -28108.34399 | -28109.01072   | -28108.96675 | -28108.96410   |
| 1.875       |              |              | -28109.00755   | -28108.96134 | -28108.95842   |
| 1.900       |              |              | -28109.00314   | -28108.95450 | -28108.95134   |
|             |              |              | $2^1\Phi_g$    |              |                |
| 1.650       | -28108.22557 | -28108.22426 | -28108.90726   |              |                |
| 1.675       | -28108.23990 | -28108.23841 | -28108.92554   |              |                |
| 1.700       | -28108.25100 | -28108.24936 | -28108.93926   | -28108.91522 | -28108.90738   |
| 1.725       | -28108.25801 | -28108.25616 | -28108.95029   | -28108.92554 | -28108.91717   |
| 1.750       | -28108.26202 | -28108.25991 | -28108.95826   | -28108.93276 | -28108.92386   |
| 1.775       | -28108.26337 | -28108.26098 | -28108.96354   | -28108.93722 | -28108.92779   |
| 1.800       | -28108.26242 | -28108.25971 | -28108.96638   | -28108.93922 | -28108.92927   |
| 1.825       | -28108.25947 | -28108.25640 | -28108.96712   | -28108.93904 | -28108.92859   |
| 1.850       | -28108.25476 | -28108.25129 | -28108.96593   | -28108.93692 | -28108.92597   |
| 1.875       |              |              | -28108.96296   | -28108.93308 | -28108.92165   |
| 1.900       |              |              | -28108.95827   | -28108.92772 | -28108.91581   |
|             |              |              | $1^1\Pi_g$     |              |                |
| 1.650       |              |              | -28108.90197   |              |                |
| 1.675       |              |              | -28108.92000   |              |                |
| 1.700       |              |              | -28108.93361   | -28108.90993 | -28108.90189   |
| 1.725       | -28108.24344 | -28108.24211 | -28108.94456   | -28108.92029 | -28108.91168   |
| 1.750       | -28108.24804 | -28108.24632 | -28108.95247   | -28108.92754 | -28108.91838   |
| 1.775       | -28108.24984 | -28108.24773 | -28108.95766   | -28108.93203 | -28108.92233   |
| 1.800       | -28108.24922 | -28108.24671 | -28108.96042   | -28108.93406 | -28108.92383   |
| 1.825       | -28108.24654 | -28108.24360 | -28108.96106   | -28108.93391 | -28108.92316   |
| 1.850       | -28108.24206 | -28108.23865 | -28108.95975   | -28108.93182 | -28108.92055   |
| 1.875       |              |              | -28108.95665   | -28108.92800 | -28108.91623   |
| 1.900       |              |              | -28108.95181   | -28108.92265 | -28108.91039   |
|             |              |              | $1^1\Sigma_u$  |              |                |
| 1.650       | -28108.28328 | -28108.28436 | -28108.95109   |              |                |
| 1.675       | -28108.29458 | -28108.29572 | -28108.96488   |              |                |
| 1.700       | -28108.30295 | -28108.30415 | -28108.97411   | -28108.94022 | -28108.95643   |
| 1.725       | -28108.30710 | -28108.30838 | -28108.98090   | -28108.94543 | -28108.96237   |
| 1.750       | -28108.30839 | -28108.30976 | -28108.98481   | -28108.94769 | -28108.96537   |
| 1.775       | -28108.30717 | -28108.30864 | -28108.98620   | -28108.94736 | -28108.96579   |
| 1.800       | -28108.30374 | -28108.30531 | -28108.98528   | -28108.94475 | -28108.96393   |
| 1.825       |              |              | -28108.98231   | -28108.94013 | -28108.96008   |
| 1.850       |              |              | -28108.97742   | -28108.93376 | -28108.95446   |
| 1.875       |              |              | -28108.97064   | -28108.92583 | -28108.94728   |
| 1.900       |              |              | -28108.96192   | -28108.91656 | -28108.93875   |
|             |              |              | $1^1\Delta_u$  |              |                |
| 1.650       | -28108.29186 | -28108.29253 | -28108.93871   |              |                |
| 1.675       | -28108.30123 | -28108.30193 | -28108.95170   |              |                |
| 1.700       | -28108.30778 | -28108.30851 | -28108.96047   | -28108.92665 | -28108.93427   |
| 1.725       | -28108.31015 | -28108.31092 | -28108.96696   | -28108.93216 | -28108.93760   |
| 1.750       | -28108.30973 | -28108.31054 | -28108.97086   | -28108.93527 | -28108.93755   |
| 1.775       | -28108.30687 | -28108.30771 | -28108.97251   | -28108.93638 | -28108.93488   |
| 1.800       | -28108.30187 | -28108.30275 | -28108.97216   | -28108.93573 | -28108.93050   |
| 1.825       | -28108.29501 | -28108.29592 | -28108.97009   | -28108.93346 | -28108.92504   |
| 1.850       | -28108.28695 | -28108.28746 | -28108.96642   | -28108.92970 | -28108.91872   |
| 1.875       |              |              | -28108.96126   | -28108.92455 | -28108.91154   |
| 1.900       |              |              | -28108.95462   | -28108.91812 | -28108.90349   |

Table S4: Excitation energies [eV] of NUN for different states and various CC methods. In all pCCD-based methods, no symmetry constraints were imposed ( $C_1$  symmetry), while in all conventional CC methods  $D_{2h}$  symmetry was imposed.

| Distance[Å]   | EOM-pCCD+S | EOM-pCCD-CCS | EOM-pCCD-LCCSD | EOM-CCSD | CR-EOM-CCSD(T) |
|---------------|------------|--------------|----------------|----------|----------------|
| $1^1\Delta_g$ |            |              |                |          |                |
| 1.650         | 4.42       | 4.43         | 3.93           |          |                |
| 1.675         | 4.30       | 4.32         | 3.78           |          |                |
| 1.700         | 4.19       | 4.21         | 3.63           | 3.51     | 3.54           |
| 1.725         | 4.08       | 4.10         | 3.49           | 3.35     | 3.40           |
| 1.750         | 3.97       | 4.00         | 3.36           | 3.19     | 3.25           |
| 1.775         | 3.87       | 3.89         | 3.23           | 3.02     | 3.11           |
| 1.800         | 3.76       | 3.79         | 3.10           | 2.86     | 2.96           |
| 1.825         | 3.66       | 3.70         | 2.97           | 2.69     | 2.82           |
| 1.850         | 3.56       | 3.61         | 2.85           | 2.53     | 2.68           |
| 1.875         |            |              | 2.74           | 2.37     | 2.55           |
| 1.900         |            |              | 2.63           | 2.20     | 2.41           |
| $1^1\Phi_g$   |            |              |                |          |                |
| 1.650         | 3.80       | 3.81         | 3.44           |          |                |
| 1.675         | 3.67       | 3.69         | 3.28           |          |                |
| 1.700         | 3.54       | 3.55         | 3.12           | 3.01     | 3.03           |
| 1.725         | 3.42       | 3.44         | 2.97           | 2.84     | 2.87           |
| 1.750         | 3.30       | 3.33         | 2.82           | 2.68     | 2.72           |
| 1.775         | 3.19       | 3.22         | 2.68           | 2.51     | 2.56           |
| 1.800         | 3.09       | 3.11         | 2.55           | 2.35     | 2.41           |
| 1.825         | 2.98       | 3.01         | 2.42           | 2.19     | 2.26           |
| 1.850         | 2.88       | 2.92         | 2.29           | 2.04     | 2.11           |
| 1.875         |            |              | 2.17           | 1.89     | 1.97           |
| 1.900         |            |              | 2.06           | 1.74     | 1.83           |
| $2^1\Phi_g$   |            |              |                |          |                |
| 1.650         | 6.89       | 6.92         | 4.97           |          |                |
| 1.675         | 6.68       | 6.72         | 4.75           |          |                |
| 1.700         | 6.47       | 6.51         | 4.54           | 4.15     | 4.37           |
| 1.725         | 6.27       | 6.32         | 4.34           | 3.92     | 4.15           |
| 1.750         | 6.08       | 6.14         | 4.15           | 3.69     | 3.94           |
| 1.775         | 5.89       | 5.96         | 3.97           | 3.47     | 3.73           |
| 1.800         | 5.71       | 5.78         | 3.81           | 3.26     | 3.53           |
| 1.825         | 5.52       | 5.61         | 3.65           | 3.05     | 3.33           |
| 1.850         | 5.35       | 5.44         | 3.51           | 2.85     | 3.15           |
| 1.875         |            |              | 3.39           | 2.66     | 2.97           |
| 1.900         |            |              | 3.28           | 2.47     | 2.79           |
| $1^1\Pi_g$    |            |              |                |          |                |
| 1.650         |            |              | 5.11           |          |                |
| 1.675         |            |              | 4.90           |          |                |
| 1.700         |            |              | 4.69           | 4.30     | 4.52           |
| 1.725         | 6.67       | 6.70         | 4.49           | 4.06     | 4.30           |
| 1.750         | 6.46       | 6.51         | 4.31           | 3.84     | 4.09           |
| 1.775         | 6.26       | 6.32         | 4.13           | 3.61     | 3.88           |
| 1.800         | 6.06       | 6.13         | 3.97           | 3.40     | 3.68           |
| 1.825         | 5.88       | 5.96         | 3.82           | 3.19     | 3.48           |
| 1.850         | 5.69       | 5.79         | 3.68           | 2.99     | 3.29           |
| 1.875         |            |              | 3.56           | 2.79     | 3.11           |
| 1.900         |            |              | 3.45           | 2.61     | 2.94           |
| $1^1\Sigma_u$ |            |              |                |          |                |
| 1.650         | 5.32       | 5.29         | 3.78           |          |                |
| 1.675         | 5.19       | 5.16         | 3.68           |          |                |
| 1.700         | 5.05       | 5.02         | 3.59           | 3.47     | 3.03           |
| 1.725         | 4.94       | 4.90         | 3.50           | 3.38     | 2.92           |
| 1.750         | 4.82       | 4.78         | 3.43           | 3.29     | 2.81           |
| 1.775         | 4.70       | 4.66         | 3.36           | 3.20     | 2.70           |
| 1.800         | 4.58       | 4.54         | 3.29           | 3.11     | 2.59           |
| 1.825         |            |              | 3.24           | 3.02     | 2.48           |
| 1.850         |            |              | 3.20           | 2.94     | 2.37           |
| 1.875         |            |              | 3.18           | 2.85     | 2.27           |
| 1.900         |            |              | 3.18           | 2.77     | 2.17           |
| $1^1\Delta_u$ |            |              |                |          |                |
| 1.650         | 5.08       | 5.06         | 4.11           |          |                |
| 1.675         | 5.01       | 4.99         | 4.04           |          |                |
| 1.700         | 4.92       | 4.90         | 3.96           | 3.84     | 3.64           |
| 1.725         | 4.85       | 4.83         | 3.88           | 3.74     | 3.59           |
| 1.750         | 4.78       | 4.76         | 3.81           | 3.63     | 3.56           |
| 1.775         | 4.71       | 4.68         | 3.73           | 3.50     | 3.54           |
| 1.800         | 4.63       | 4.61         | 3.65           | 3.35     | 3.50           |
| 1.825         | 4.56       | 4.53         | 3.57           | 3.20     | 3.43           |
| 1.850         | 4.47       | 4.46         | 3.50           | 3.05     | 3.34           |
| 1.875         |            |              | 3.43           | 2.89     | 3.24           |
| 1.900         |            |              | 3.38           | 2.73     | 3.13           |

S3  $\text{PaO}_2^+$ 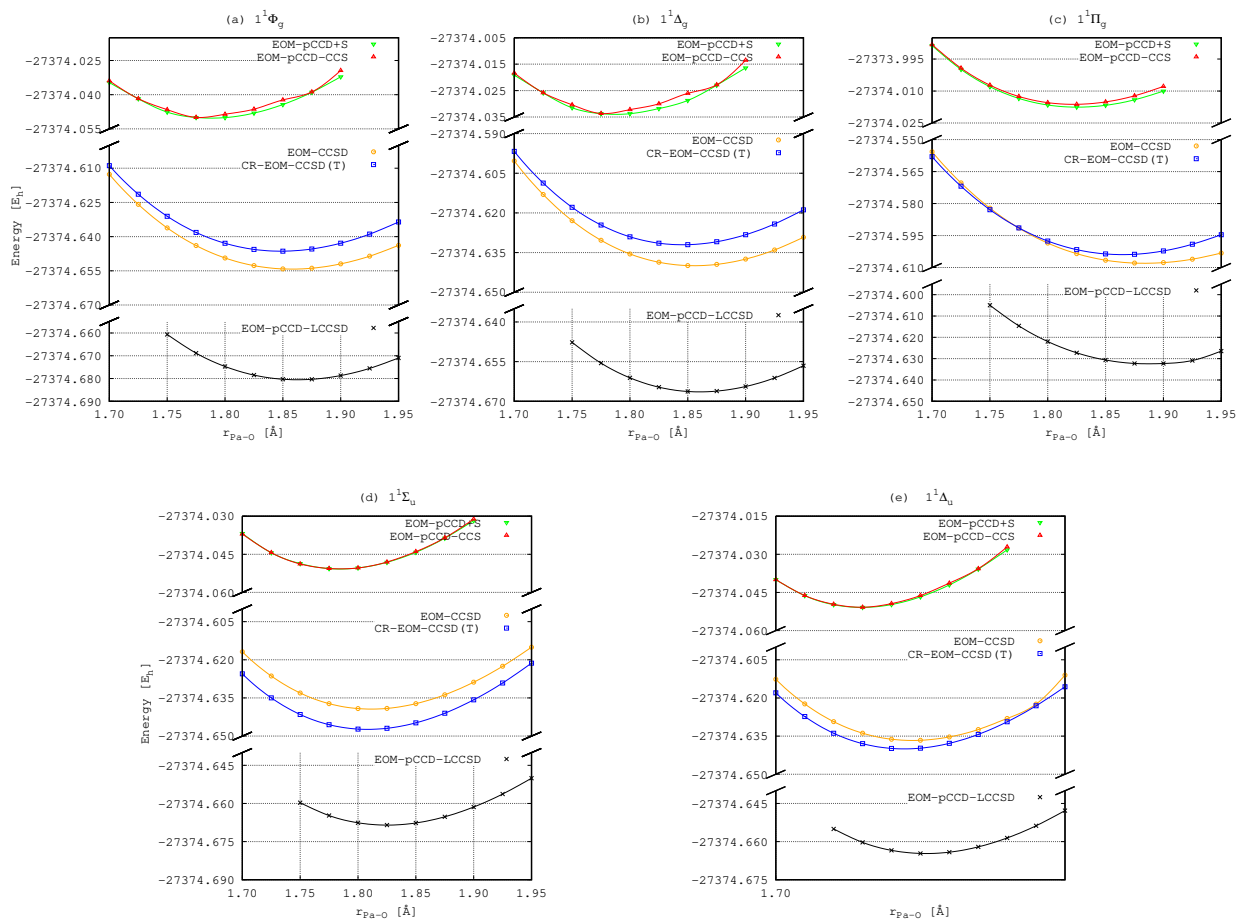

Figure S3: Potential energy surfaces of the lowest-lying excited states of  $\text{PaO}_2^+$  determined for various EOM-CC methods. In all pCCD-based methods, no symmetry constraints were imposed ( $C_1$  symmetry), while in all conventional CC methods  $D_{2h}$  symmetry was imposed.



Table S5: Total electronic energies [ $E_h$ ] of  $\text{PaO}_2^+$  for different states and various CC methods. In all pCCD-based methods, no symmetry constraints were imposed ( $C_1$  symmetry), while in all conventional CC methods  $D_{2h}$  symmetry was imposed.

| Distance[Å]   | pCCD         | pCCD-CCS     | pCCD-LCCSD     | CCSD         |                |
|---------------|--------------|--------------|----------------|--------------|----------------|
| $X^1\Sigma^+$ |              |              |                |              |                |
| 1.650         | -27374.24940 | -27374.24938 |                |              |                |
| 1.675         | -27374.26221 | -27374.26218 | -27374.82507   | -27374.79788 |                |
| 1.700         | -27374.27120 | -27374.27117 | -27374.83615   | -27374.80776 |                |
| 1.725         | -27374.27684 | -27374.27680 | -27374.84410   | -27374.81424 |                |
| 1.750         | -27374.27951 | -27374.27946 | -27374.84899   | -27374.81770 |                |
| 1.775         | -27374.27954 | -27374.27948 | -27374.85139   | -27374.81848 |                |
| 1.800         | -27374.27724 | -27374.27716 | -27374.85152   | -27374.81686 |                |
| 1.825         | -27374.27286 | -27374.27276 | -27374.84966   | -27374.81310 |                |
| 1.850         | -27374.26665 | -27374.26652 | -27374.84603   | -27374.80743 |                |
| 1.875         | -27374.25879 | -27374.25864 | -27374.84078   | -27374.80005 |                |
| 1.900         | -27374.24947 | -27374.24928 | -27374.83413   | -27374.79114 |                |
| 1.925         | -27374.23883 | -27374.23861 | -27374.82626   | -27374.78086 |                |
| 1.950         | -27374.22704 | -27374.22676 | -27374.81732   | -27374.76936 |                |
| 1.975         | -27374.21422 | -27374.21389 |                |              |                |
| 2.000         | -27374.20049 | -27374.20009 | -27374.79683   |              |                |
| Distance[Å]   | EOM-pCCD+S   | EOM-pCCD-CCS | EOM-pCCD-LCCSD | EOM-CCSD     | CR-EOM-CCSD(T) |
| $1^1\Phi_g$   |              |              |                |              |                |
| 1.675         |              |              |                | -27374.59629 | -27374.59308   |
| 1.700         | -27374.03469 | -27374.03390 |                | -27374.61268 | -27374.60887   |
| 1.725         | -27374.04178 | -27374.04174 |                | -27374.62586 | -27374.62141   |
| 1.750         | -27374.04764 | -27374.04657 | -27374.66066   | -27374.63617 | -27374.63107   |
| 1.775         | -27374.05001 | -27374.04995 | -27374.66885   | -27374.64393 | -27374.63816   |
| 1.800         | -27374.05006 | -27374.04859 | -27374.67472   | -27374.64937 | -27374.64293   |
| 1.825         | -27374.04809 | -27374.04636 | -27374.67849   | -27374.65272 | -27374.64561   |
| 1.850         | -27374.04432 | -27374.04230 | -27374.68032   | -27374.65417 | -27374.64638   |
| 1.875         | -27374.03894 | -27374.03879 | -27374.68033   | -27374.65387 | -27374.64543   |
| 1.900         | -27374.03215 | -27374.02940 | -27374.67870   | -27374.65196 | -27374.64289   |
| 1.925         |              |              | -27374.67555   | -27374.64858 | -27374.63890   |
| 1.950         |              |              | -27374.67097   | -27374.64385 | -27374.63359   |
| $1^1\Delta_g$ |              |              |                |              |                |
| 1.675         |              |              |                | -27374.58455 | -27374.58163   |
| 1.700         | -27374.01916 | -27374.01836 |                | -27374.60035 | -27374.59673   |
| 1.725         | -27374.02587 | -27374.02583 |                | -27374.61303 | -27374.60870   |
| 1.750         | -27374.03151 | -27374.03039 | -27374.64772   | -27374.62293 | -27374.61789   |
| 1.775         | -27374.03374 | -27374.03368 | -27374.65556   | -27374.63035 | -27374.62458   |
| 1.800         | -27374.03375 | -27374.03221 | -27374.66113   | -27374.63552 | -27374.62903   |
| 1.825         | -27374.03182 | -27374.03001 | -27374.66467   | -27374.63865 | -27374.63145   |
| 1.850         | -27374.02873 | -27374.02605 | -27374.66629   | -27374.63991 | -27374.63202   |
| 1.875         | -27374.02296 | -27374.02281 | -27374.66615   | -27374.63947 | -27374.63090   |
| 1.900         | -27374.01641 | -27374.01352 | -27374.66440   | -27374.63746 | -27374.62825   |
| 1.925         |              |              | -27374.66117   | -27374.63401 | -27374.62419   |
| 1.950         |              |              | -27374.65655   | -27374.62923 | -27374.61884   |
| $1^1\Sigma_u$ |              |              |                |              |                |
| 1.675         |              |              |                | -27374.60407 | -27374.61282   |
| 1.700         | -27374.03680 | -27374.03704 |                | -27374.61683 | -27374.62552   |
| 1.725         | -27374.04441 | -27374.04437 |                | -27374.62637 | -27374.63497   |
| 1.750         | -27374.04867 | -27374.04881 | -27374.65969   | -27374.63307 | -27374.64153   |
| 1.775         | -27374.05064 | -27374.05058 | -27374.66475   | -27374.63725 | -27374.64553   |
| 1.800         | -27374.05038 | -27374.05037 | -27374.66760   | -27374.63919 | -27374.64726   |
| 1.825         | -27374.04816 | -27374.04805 | -27374.66851   | -27374.63912 | -27374.64694   |
| 1.850         | -27374.04421 | -27374.04397 | -27374.66767   | -27374.63725 | -27374.64480   |
| 1.875         | -27374.03867 | -27374.03852 | -27374.66523   | -27374.63376 | -27374.64101   |
| 1.900         | -27374.03175 | -27374.03116 | -27374.66139   | -27374.62881 | -27374.63574   |
| 1.925         |              |              | -27374.65629   | -27374.62253 | -27374.62913   |
| 1.950         |              |              | -27374.65007   | -27374.61506 | -27374.62132   |
| $1^1\Delta_u$ |              |              |                |              |                |
| 1.675         |              |              |                | -27374.59985 | -27374.60547   |
| 1.700         | -27374.03998 | -27374.03995 |                | -27374.61265 | -27374.61797   |
| 1.725         | -27374.04624 | -27374.04620 |                | -27374.62235 | -27374.62732   |
| 1.750         | -27374.04982 | -27374.04965 | -27374.65502   | -27374.62931 | -27374.63388   |
| 1.775         | -27374.05088 | -27374.05082 | -27374.66030   | -27374.63385 | -27374.63797   |
| 1.800         | -27374.04977 | -27374.04938 | -27374.66344   | -27374.63622 | -27374.63984   |
| 1.825         | -27374.04675 | -27374.04622 | -27374.66465   | -27374.63665 | -27374.63974   |
| 1.850         | -27374.04205 | -27374.04134 | -27374.66417   | -27374.63532 | -27374.63784   |
| 1.875         | -27374.03581 | -27374.03566 | -27374.66208   | -27374.63241 | -27374.63434   |
| 1.900         | -27374.02824 | -27374.02708 | -27374.65856   | -27374.62807 | -27374.62937   |
| 1.925         |              |              | -27374.65377   | -27374.62242 | -27374.62308   |
| 1.950         |              |              | -27374.64781   | -27374.61103 | -27374.61559   |
| $1^1\Pi_g$    |              |              |                |              |                |
| 1.675         |              |              |                | -27374.53801 | -27374.54113   |
| 1.700         | -27373.98869 | -27373.98823 |                | -27374.55568 | -27374.55802   |
| 1.725         | -27373.99984 | -27373.99925 |                | -27374.57030 | -27374.57185   |
| 1.750         | -27374.00798 | -27374.00724 | -27374.60496   | -27374.58216 | -27374.58290   |
| 1.775         | -27374.01346 | -27374.01255 | -27374.61462   | -27374.59150 | -27374.59141   |
| 1.800         | -27374.01657 | -27374.01546 | -27374.62198   | -27374.59855 | -27374.59759   |
| 1.825         | -27374.01756 | -27374.01624 | -27374.62727   | -27374.60351 | -27374.60162   |
| 1.850         | -27374.01669 | -27374.01511 | -27374.63065   | -27374.60658 | -27374.60364   |
| 1.875         | -27374.01412 | -27374.01224 | -27374.63225   | -27374.60792 | -27374.60381   |
| 1.900         | -27374.01004 | -27374.00784 | -27374.63228   | -27374.60771 | -27374.60223   |
| 1.925         |              |              | -27374.63088   | -27374.60610 | -27374.59909   |
| 1.950         |              |              | -27374.62645   | -27374.60323 | -27374.59462   |

Table S6: Excitation energies [eV] of  $\text{PaO}_2^+$  for different states and various CC methods. In all pCCD-based methods, no symmetry constraints were imposed ( $C_1$  symmetry), while in all conventional CC methods  $D_{2h}$  symmetry was imposed.

| Distance[Å]   | EOM-pCCD+S | EOM-pCCD-CCS | EOM-pCCD-LCCSD | EOM-CCSD | CR-EOM-CCSD(T) |
|---------------|------------|--------------|----------------|----------|----------------|
| $1^1\Phi_g$   |            |              |                |          |                |
| 1.675         |            |              |                | 5.49     | 5.57           |
| 1.700         | 6.44       | 6.46         |                | 5.31     | 5.41           |
| 1.725         | 6.40       | 6.40         |                | 5.13     | 5.25           |
| 1.750         | 6.31       | 6.34         | 5.12           | 4.94     | 5.08           |
| 1.775         | 6.25       | 6.25         | 4.97           | 4.75     | 4.91           |
| 1.800         | 6.18       | 6.22         | 4.81           | 4.56     | 4.73           |
| 1.825         | 6.12       | 6.16         | 4.66           | 4.36     | 4.56           |
| 1.850         | 6.05       | 6.10         | 4.51           | 4.17     | 4.38           |
| 1.875         | 5.98       | 5.98         | 4.37           | 3.98     | 4.21           |
| 1.900         | 5.91       | 5.98         | 4.23           | 3.79     | 4.03           |
| 1.925         |            |              | 4.10           | 3.60     | 3.86           |
| 1.950         |            |              | 3.98           | 3.42     | 3.69           |
| $1^1\Delta_g$ |            |              |                |          |                |
| 1.675         |            |              |                | 5.80     | 5.88           |
| 1.700         | 6.86       | 6.88         |                | 5.64     | 5.74           |
| 1.725         | 6.83       | 6.83         |                | 5.48     | 5.59           |
| 1.750         | 6.75       | 6.78         | 5.48           | 5.30     | 5.44           |
| 1.775         | 6.69       | 6.69         | 5.33           | 5.12     | 5.28           |
| 1.800         | 6.63       | 6.67         | 5.18           | 4.93     | 5.11           |
| 1.825         | 6.56       | 6.61         | 5.03           | 4.75     | 4.94           |
| 1.850         | 6.47       | 6.54         | 4.89           | 4.56     | 4.77           |
| 1.875         | 6.42       | 6.42         | 4.75           | 4.37     | 4.60           |
| 1.900         | 6.34       | 6.42         | 4.62           | 4.18     | 4.43           |
| 1.925         |            |              | 4.49           | 4.00     | 4.26           |
| 1.950         |            |              | 4.37           | 3.81     | 4.10           |
| $1^1\Sigma_u$ |            |              |                |          |                |
| 1.675         |            |              |                | 5.27     | 5.04           |
| 1.700         | 6.38       | 6.37         |                | 5.20     | 4.96           |
| 1.725         | 6.32       | 6.32         |                | 5.11     | 4.88           |
| 1.750         | 6.28       | 6.28         | 5.15           | 5.02     | 4.79           |
| 1.775         | 6.23       | 6.23         | 5.08           | 4.93     | 4.71           |
| 1.800         | 6.17       | 6.17         | 5.00           | 4.83     | 4.62           |
| 1.825         | 6.11       | 6.11         | 4.93           | 4.73     | 4.52           |
| 1.850         | 6.05       | 6.06         | 4.85           | 4.63     | 4.43           |
| 1.875         | 5.99       | 5.99         | 4.78           | 4.52     | 4.33           |
| 1.900         | 5.92       | 5.94         | 4.70           | 4.42     | 4.23           |
| 1.925         |            |              | 4.63           | 4.31     | 4.13           |
| 1.950         |            |              | 4.55           | 4.20     | 4.03           |
| $1^1\Delta_u$ |            |              |                |          |                |
| 1.675         |            |              |                | 5.39     | 5.24           |
| 1.700         | 6.29       | 6.29         |                | 5.31     | 5.16           |
| 1.725         | 6.28       | 6.28         |                | 5.22     | 5.09           |
| 1.750         | 6.25       | 6.25         | 5.28           | 5.13     | 5.00           |
| 1.775         | 6.22       | 6.22         | 5.20           | 5.02     | 4.91           |
| 1.800         | 6.19       | 6.20         | 5.12           | 4.92     | 4.82           |
| 1.825         | 6.15       | 6.16         | 5.03           | 4.80     | 4.72           |
| 1.850         | 6.11       | 6.13         | 4.95           | 4.68     | 4.61           |
| 1.875         | 6.07       | 6.07         | 4.86           | 4.56     | 4.51           |
| 1.900         | 6.02       | 6.05         | 4.78           | 4.44     | 4.40           |
| 1.925         |            |              | 4.69           | 4.31     | 4.29           |
| 1.950         |            |              | 4.61           | 4.31     | 4.18           |
| $1^1\Pi_g$    |            |              |                |          |                |
| 1.675         |            |              |                | 7.07     | 6.99           |
| 1.700         | 7.69       | 7.70         |                | 6.86     | 6.80           |
| 1.725         | 7.54       | 7.55         |                | 6.64     | 6.60           |
| 1.750         | 7.39       | 7.41         | 6.64           | 6.41     | 6.39           |
| 1.775         | 7.24       | 7.26         | 6.44           | 6.18     | 6.18           |
| 1.800         | 7.09       | 7.12         | 6.25           | 5.94     | 5.97           |
| 1.825         | 6.95       | 6.98         | 6.05           | 5.70     | 5.75           |
| 1.850         | 6.80       | 6.84         | 5.86           | 5.47     | 5.55           |
| 1.875         | 6.66       | 6.70         | 5.67           | 5.23     | 5.34           |
| 1.900         | 6.52       | 6.57         | 5.49           | 4.99     | 5.14           |
| 1.925         |            |              | 5.32           | 4.76     | 4.95           |
| 1.950         |            |              | 5.19           | 4.52     | 4.75           |

S4 ThO<sub>2</sub>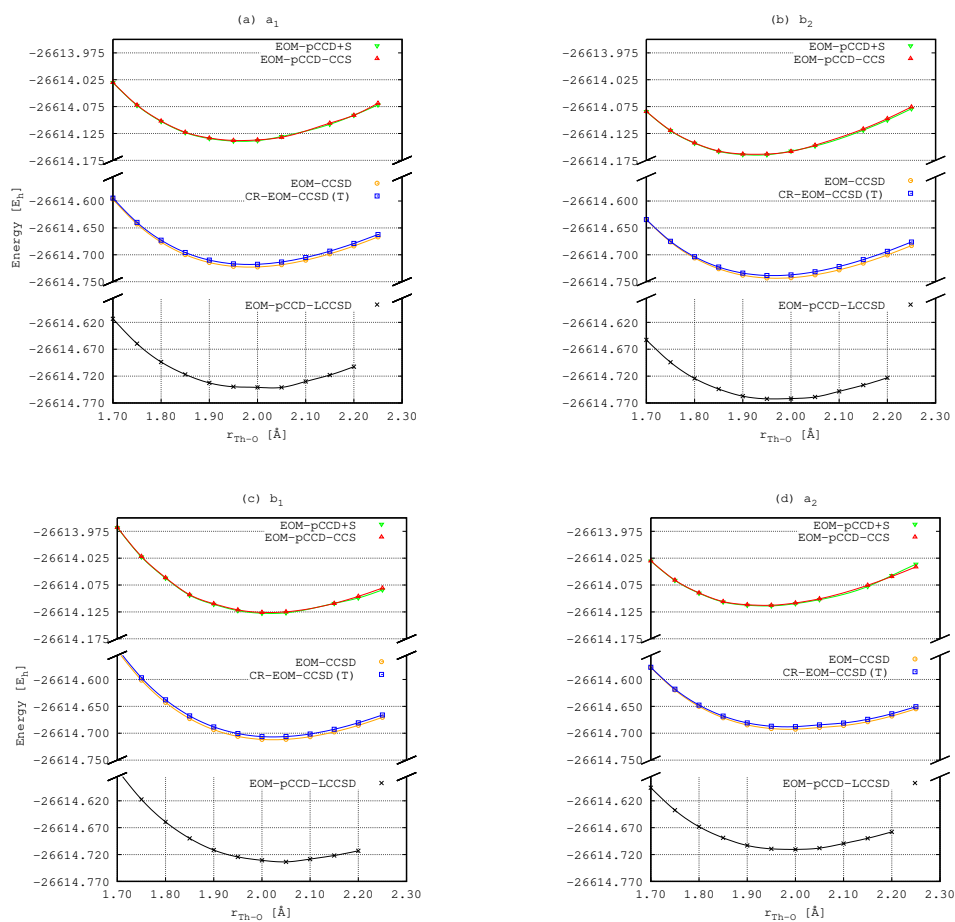

Figure S4: Potential energy surfaces of the lowest-lying excited states of ThO<sub>2</sub> determined for various EOM-CC methods. In all pCCD-based methods, no symmetry constraints were imposed ( $C_1$  symmetry), while in all conventional CC methods  $D_{2h}$  symmetry was imposed.

Table S7: Total electronic energies [ $E_h$ ] of  $\text{ThO}_2$  for different states and various CC methods. In all pCCD-based methods, no symmetry constraints were imposed ( $C_1$  symmetry), while in all conventional CC methods  $C_{2v}$  symmetry was imposed.

| Distance[Å] | pCCD         | pCCD-CCS     | pCCD-LCCSD     | CCSD         |                |
|-------------|--------------|--------------|----------------|--------------|----------------|
|             |              |              | $X^1\Sigma^+$  |              |                |
| 1.700       | -26614.25295 | -26614.25292 | -26614.77198   | -26614.74828 |                |
| 1.750       | -26614.29247 | -26614.29244 | -26614.81183   | -26614.78697 |                |
| 1.800       | -26614.31837 | -26614.31834 | -26614.83911   | -26614.81288 |                |
| 1.850       | -26614.33472 | -26614.33469 | -26614.85500   | -26614.82817 |                |
| 1.900       | -26614.34039 | -26614.34034 | -26614.86430   | -26614.83463 |                |
| 1.950       | -26614.33957 | -26614.33951 | -26614.86483   | -26614.83378 |                |
| 2.000       | -26614.33274 | -26614.33267 | -26614.86013   | -26614.82689 |                |
| 2.050       | -26614.32098 | -26614.32090 | -26614.85100   | -26614.81505 |                |
| 2.100       |              |              | -26614.83818   | -26614.79921 |                |
| 2.150       | -26614.28593 | -26614.28581 | -26614.82449   | -26614.78017 |                |
| 2.200       | -26614.26433 | -26614.26418 | -26614.81099   | -26614.75860 |                |
| 2.250       | -26614.24085 | -26614.24066 | -26614.79601   | -26614.73509 |                |
| Distance[Å] | EOM-pCCD+S   | EOM-pCCD-CCS | EOM-pCCD-LCCSD | EOM-CCSD     | CR-EOM-CCSD(T) |
|             |              |              | $a_1$          |              |                |
| 1.700       | -26614.03049 | -26614.02994 | -26614.61333   | -26614.59677 | -26614.59453   |
| 1.750       | -26614.07277 | -26614.07212 | -26614.65957   | -26614.64269 | -26614.63972   |
| 1.800       | -26614.10258 | -26614.10181 | -26614.69368   | -26614.67638 | -26614.67279   |
| 1.850       | -26614.12351 | -26614.12265 | -26614.71679   | -26614.69973 | -26614.69564   |
| 1.900       | -26614.13447 | -26614.13344 | -26614.73264   | -26614.71433 | -26614.70984   |
| 1.950       | -26614.13917 | -26614.13798 | -26614.73978   | -26614.72154 | -26614.71676   |
| 2.000       | -26614.13839 | -26614.13703 | -26614.74095   | -26614.72256 | -26614.71759   |
| 2.050       | -26614.13067 | -26614.13210 | -26614.74105   | -26614.71843 | -26614.71336   |
| 2.100       |              |              | -26614.73004   | -26614.71006 | -26614.70498   |
| 2.150       | -26614.10801 | -26614.10582 | -26614.71801   | -26614.69823 | -26614.69323   |
| 2.200       | -26614.09120 | -26614.09105 | -26614.70249   | -26614.68361 | -26614.67878   |
| 2.250       | -26614.07187 | -26614.06876 |                | -26614.66675 | -26614.66220   |
|             |              |              | $b_2$          |              |                |
| 1.700       | -26614.08433 | -26614.08396 | -26614.65264   | -26614.63485 | -26614.63453   |
| 1.750       | -26614.11983 | -26614.11935 | -26614.69417   | -26614.67610 | -26614.67476   |
| 1.800       | -26614.14319 | -26614.14259 | -26614.72431   | -26614.70585 | -26614.70354   |
| 1.850       | -26614.15834 | -26614.15762 | -26614.74406   | -26614.72597 | -26614.72277   |
| 1.900       | -26614.16430 | -26614.16321 | -26614.75733   | -26614.73798 | -26614.73398   |
| 1.950       | -26614.16463 | -26614.16332 | -26614.76228   | -26614.74317 | -26614.73846   |
| 2.000       | -26614.15780 | -26614.15859 | -26614.76174   | -26614.74264 | -26614.73731   |
| 2.050       | -26614.14841 | -26614.14682 | -26614.75886   | -26614.73732 | -26614.73148   |
| 2.100       |              |              | -26614.74838   | -26614.72803 | -26614.72180   |
| 2.150       | -26614.11888 | -26614.11661 | -26614.73682   | -26614.71548 | -26614.70896   |
| 2.200       | -26614.10006 | -26614.09733 | -26614.72314   | -26614.70025 | -26614.69358   |
| 2.250       | -26614.07895 | -26614.07565 |                | -26614.68285 | -26614.67617   |
|             |              |              | $b_1$          |              |                |
| 1.700       | -26613.96823 | -26613.96757 | -26614.56241   | -26614.54684 | -26614.54280   |
| 1.750       | -26614.02261 | -26614.02185 | -26614.61739   | -26614.60128 | -26614.59677   |
| 1.800       | -26614.06215 | -26614.06126 | -26614.65926   | -26614.64262 | -26614.63779   |
| 1.850       | -26614.09393 | -26614.09300 | -26614.68990   | -26614.67276 | -26614.66770   |
| 1.900       | -26614.11097 | -26614.10978 | -26614.71162   | -26614.69335 | -26614.68815   |
| 1.950       | -26614.12259 | -26614.12122 | -26614.72440   | -26614.70584 | -26614.70057   |
| 2.000       | -26614.12749 | -26614.12591 | -26614.73075   | -26614.71148 | -26614.70621   |
| 2.050       | -26614.12668 | -26614.12484 | -26614.73360   | -26614.71137 | -26614.70614   |
| 2.100       |              |              | -26614.72843   | -26614.70644 | -26614.70131   |
| 2.150       | -26614.10922 | -26614.10910 | -26614.72176   | -26614.69753 | -26614.69256   |
| 2.200       | -26614.09907 | -26614.09610 | -26614.71303   | -26614.68533 | -26614.68058   |
| 2.250       | -26614.08411 | -26614.08060 |                | -26614.67046 | -26614.66601   |
|             |              |              | $a_2$          |              |                |
| 1.700       | -26614.03049 | -26614.02994 | -26614.59561   | -26614.57791 | -26614.57731   |
| 1.750       | -26614.06635 | -26614.06585 | -26614.63742   | -26614.61954 | -26614.61798   |
| 1.800       | -26614.09018 | -26614.08955 | -26614.66813   | -26614.65002 | -26614.64759   |
| 1.850       | -26614.10652 | -26614.10577 | -26614.68880   | -26614.67119 | -26614.66800   |
| 1.900       | -26614.11256 | -26614.11161 | -26614.70310   | -26614.68453 | -26614.68069   |
| 1.950       | -26614.11373 | -26614.11258 | -26614.70934   | -26614.69127 | -26614.68691   |
| 2.000       | -26614.10968 | -26614.10830 | -26614.71036   | -26614.69248 | -26614.68772   |
| 2.050       | -26614.10224 | -26614.10058 | -26614.70800   | -26614.68938 | -26614.68438   |
| 2.100       |              |              | -26614.69951   | -26614.68573 | -26614.68092   |
| 2.150       | -26614.07771 | -26614.07537 | -26614.68971   | -26614.67863 | -26614.67405   |
| 2.200       | -26614.05723 | -26614.05914 | -26614.67779   | -26614.66802 | -26614.66374   |
| 2.250       | -26614.03615 | -26614.04128 |                | -26614.65455 | -26614.65062   |

Table S8: Excitation energies [eV] of ThO<sub>2</sub> for different states and various CC methods. In all pCCD-based methods, no symmetry constraints were imposed ( $C_1$  symmetry), while in all conventional CC methods  $D_{2h}$  symmetry was imposed.

| Distance[Å] | EOM-pCCD+S | EOM-pCCD-CCS | EOM-pCCD-LCCSD | EOM-CCSD | CR-EOM-CCSD(T) |
|-------------|------------|--------------|----------------|----------|----------------|
| $a_1$       |            |              |                |          |                |
| 1.700       | 6.05       | 6.07         | 4.32           | 4.12     | 4.18           |
| 1.750       | 5.98       | 6.00         | 4.14           | 3.93     | 4.01           |
| 1.800       | 5.87       | 5.89         | 3.96           | 3.71     | 3.81           |
| 1.850       | 5.75       | 5.77         | 3.76           | 3.49     | 3.61           |
| 1.900       | 5.60       | 5.63         | 3.58           | 3.27     | 3.40           |
| 1.950       | 5.45       | 5.48         | 3.40           | 3.05     | 3.18           |
| 2.000       | 5.29       | 5.32         | 3.24           | 2.84     | 2.97           |
| 2.050       | 5.18       | 5.14         | 2.99           | 2.63     | 2.77           |
| 2.100       |            |              | 2.94           | 2.43     | 2.56           |
| 2.150       | 4.84       | 4.90         | 2.90           | 2.23     | 2.37           |
| 2.200       | 4.71       | 4.71         | 2.95           | 2.04     | 2.17           |
| 2.250       | 4.60       | 4.68         |                | 1.86     | 1.98           |
| $b_2$       |            |              |                |          |                |
| 1.700       | 4.59       | 4.60         | 3.25           | 3.09     | 3.10           |
| 1.750       | 4.70       | 4.71         | 3.20           | 3.02     | 3.05           |
| 1.800       | 4.77       | 4.78         | 3.12           | 2.91     | 2.98           |
| 1.850       | 4.80       | 4.82         | 3.02           | 2.78     | 2.87           |
| 1.900       | 4.79       | 4.82         | 2.91           | 2.63     | 2.74           |
| 1.950       | 4.76       | 4.79         | 2.79           | 2.47     | 2.59           |
| 2.000       | 4.76       | 4.74         | 2.68           | 2.29     | 2.44           |
| 2.050       | 4.70       | 4.74         | 2.51           | 2.12     | 2.27           |
| 2.100       |            | 0.00         | 2.44           | 1.94     | 2.11           |
| 2.150       | 4.55       | 4.60         | 2.39           | 1.76     | 1.94           |
| 2.200       | 4.47       | 4.54         |                | 1.59     | 1.77           |
| 2.250       | 4.41       | 4.49         |                | 1.42     | 1.60           |
| $b_1$       |            |              |                |          |                |
| 1.700       | 7.75       | 7.76         | 5.70           | 5.48     | 5.59           |
| 1.750       | 7.34       | 7.36         | 5.29           | 5.05     | 5.18           |
| 1.800       | 6.97       | 7.00         | 4.89           | 4.63     | 4.76           |
| 1.850       | 6.55       | 6.58         | 4.49           | 4.23     | 4.37           |
| 1.900       | 6.24       | 6.27         | 4.15           | 3.84     | 3.99           |
| 1.950       | 5.90       | 5.94         | 3.82           | 3.48     | 3.62           |
| 2.000       | 5.59       | 5.63         | 3.52           | 3.14     | 3.28           |
| 2.050       | 5.29       | 5.34         | 3.19           | 2.82     | 2.96           |
| 2.100       |            | 0.00         | 2.99           | 2.52     | 2.66           |
| 2.150       | 4.81       | 4.81         | 2.80           | 2.25     | 2.38           |
| 2.200       | 4.50       | 4.57         | 2.67           | 1.99     | 2.12           |
| 2.250       | 4.27       | 4.36         |                | 1.76     | 1.88           |
| $a_2$       |            |              |                |          |                |
| 1.700       | 6.05       | 6.07         | 4.80           | 4.64     | 4.65           |
| 1.750       | 6.15       | 6.17         | 4.75           | 4.56     | 4.60           |
| 1.800       | 6.21       | 6.23         | 4.65           | 4.43     | 4.50           |
| 1.850       | 6.21       | 6.23         | 4.52           | 4.27     | 4.36           |
| 1.900       | 6.20       | 6.22         | 4.39           | 4.08     | 4.19           |
| 1.950       | 6.15       | 6.18         | 4.23           | 3.88     | 4.00           |
| 2.000       | 6.07       | 6.11         | 4.08           | 3.66     | 3.79           |
| 2.050       | 5.95       | 6.00         | 3.89           | 3.42     | 3.56           |
| 2.100       |            | 0.00         | 3.77           | 3.09     | 3.22           |
| 2.150       | 5.67       | 5.73         | 3.67           | 2.76     | 2.89           |
| 2.200       | 5.64       | 5.58         | 3.62           | 2.46     | 2.58           |
| 2.250       | 5.57       | 5.43         |                | 2.19     | 2.30           |

## S5 ThO

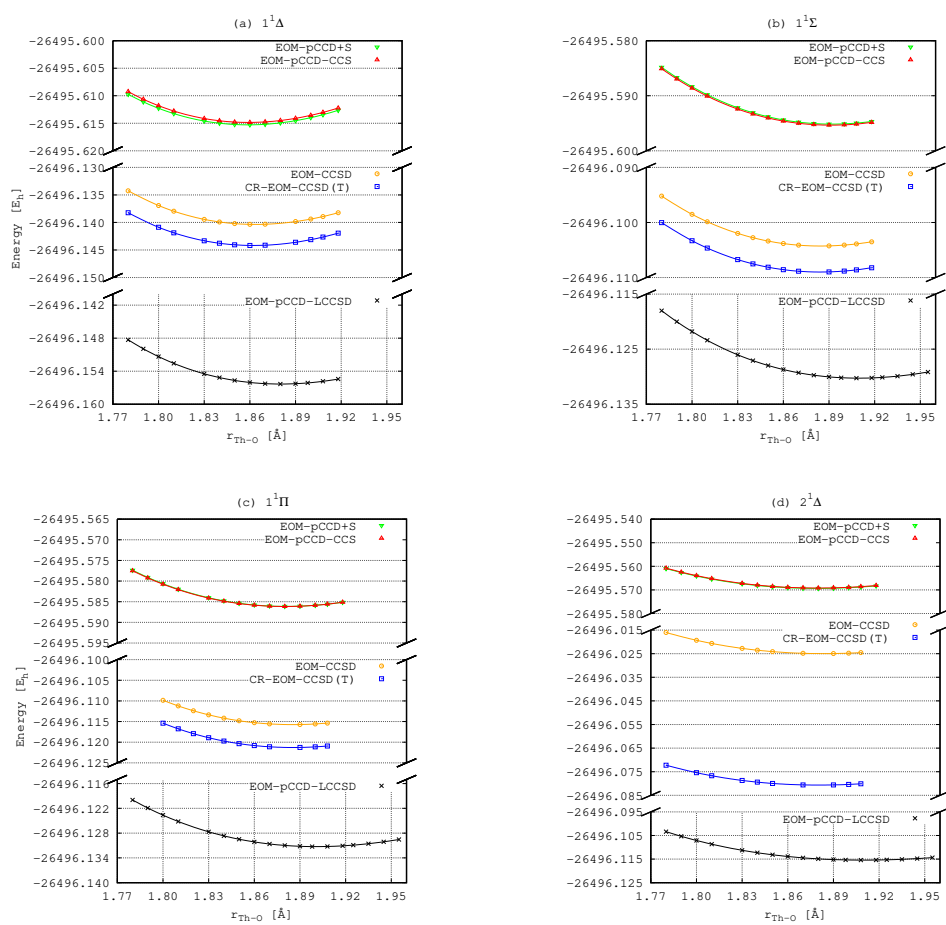

Figure S5: Potential energy surfaces of the lowest-lying excited states of ThO determined for various EOM-CC methods. In all pCCD-based methods, no symmetry constraints were imposed ( $C_1$  symmetry), while in all conventional CC methods  $C_{2v}$  symmetry was imposed.

Table S9: Total electronic energies  $[E_h]$  of ThO for different states and various CC methods. In all pCCD-based methods, no symmetry constraints were imposed ( $C_1$  symmetry), while in all conventional CC methods  $C_{2v}$  symmetry was imposed.

| Distance[Å] | pCCD         | pCCD-CCS     | pCCD-LCCSD     | CCSD         |                |
|-------------|--------------|--------------|----------------|--------------|----------------|
|             |              |              | $X^1\Sigma^+$  |              |                |
| 1.780       | -26495.68519 | -26495.68518 | -26496.20682   | -26496.18616 |                |
| 1.790       | -26495.68646 | -26495.68645 | -26496.20835   |              |                |
| 1.800       | -26495.68751 | -26495.68750 | -26496.20967   | -26496.18854 |                |
| 1.810       | -26495.68836 | -26495.68835 | -26496.21079   | -26496.18942 |                |
| 1.820       |              |              |                | -26496.19009 |                |
| 1.830       | -26495.68946 | -26495.68945 | -26496.21247   | -26496.19058 |                |
| 1.840       | -26495.68973 | -26495.68972 | -26496.21304   | -26496.19088 |                |
| 1.850       | -26495.68982 | -26495.68981 | -26496.21345   | -26496.19101 |                |
| 1.860       | -26495.68973 | -26495.68973 | -26496.21370   | -26496.19097 |                |
| 1.870       | -26495.68949 | -26495.68948 | -26496.21380   | -26496.19077 |                |
| 1.880       | -26495.68908 | -26495.68907 | -26496.21376   |              |                |
| 1.890       | -26495.68852 | -26495.68851 | -26496.21358   | -26496.18992 |                |
| 1.900       | -26495.68781 | -26495.68780 | -26496.21334   | -26496.18928 |                |
| 1.908       | -26495.68714 | -26495.68713 | -26496.21294   | -26496.18867 |                |
| 1.918       | -26495.68618 | -26495.68617 | -26496.21241   | -26496.18779 |                |
| Distance[Å] | EOM-pCCD+S   | EOM-pCCD-CCS | EOM-pCCD-LCCSD | EOM-CCSD     | CR-EOM-CCSD(T) |
|             |              |              | $1^1\Delta$    |              |                |
| 1.780       | -26495.60974 | -26495.60926 | -26496.14831   | -26496.13425 | -26496.13824   |
| 1.790       | -26495.61112 | -26495.61063 | -26496.14993   |              |                |
| 1.800       | -26495.61228 | -26495.61180 | -26496.15135   | -26496.13693 | -26496.14087   |
| 1.810       | -26495.61324 | -26495.61277 | -26496.15258   | -26496.13795 | -26496.14188   |
| 1.820       |              |              |                |              |                |
| 1.830       | -26495.61459 | -26495.61413 | -26496.15447   | -26496.13944 | -26496.14332   |
| 1.840       | -26495.61499 | -26495.61454 | -26496.15516   | -26496.13991 | -26496.14378   |
| 1.850       | -26495.61522 | -26495.61477 | -26496.15568   | -26496.14021 | -26496.14405   |
| 1.860       | -26495.61528 | -26495.61484 | -26496.15604   | -26496.14034 | -26496.14417   |
| 1.870       | -26495.61518 | -26495.61475 | -26496.15626   | -26496.14032 | -26496.14413   |
| 1.880       | -26495.61493 | -26495.61450 | -26496.15633   |              |                |
| 1.890       | -26495.61453 | -26495.61410 | -26496.15627   | -26496.13984 | -26496.14360   |
| 1.900       | -26495.61398 | -26495.61356 | -26496.15613   | -26496.13938 | -26496.14313   |
| 1.908       | -26495.61344 | -26495.61302 | -26496.15584   | -26496.13893 | -26496.14265   |
| 1.918       | -26495.61265 | -26495.61223 | -26496.15543   | -26496.13824 | -26496.14194   |
|             |              |              | $1^1\Sigma$    |              |                |
| 1.780       | -26495.58483 | -26495.58509 | -26496.11801   | -26496.09521 | -26496.10003   |
| 1.790       | -26495.58670 | -26495.58696 | -26496.12001   |              |                |
| 1.800       | -26495.58836 | -26495.58861 | -26496.12179   | -26496.09852 | -26496.10331   |
| 1.810       | -26495.58982 | -26495.59007 | -26496.12339   | -26496.09987 | -26496.10465   |
| 1.820       |              |              |                |              |                |
| 1.830       | -26495.59218 | -26495.59241 | -26496.12602   | -26496.10198 | -26496.10674   |
| 1.840       | -26495.59309 | -26495.59331 | -26496.12707   | -26496.10277 | -26496.10752   |
| 1.850       | -26495.59382 | -26495.59404 | -26496.12797   | -26496.10338 | -26496.10813   |
| 1.860       | -26495.59439 | -26495.59460 | -26496.12870   | -26496.10383 | -26496.10857   |
| 1.870       | -26495.59479 | -26495.59500 | -26496.12928   | -26496.10412 | -26496.10885   |
| 1.880       | -26495.59504 | -26495.59524 | -26496.12973   |              |                |
| 1.890       | -26495.59515 | -26495.59534 | -26496.13003   | -26496.10426 | -26496.10898   |
| 1.900       | -26495.59510 | -26495.59528 | -26496.13018   | -26496.10411 | -26496.10882   |
| 1.908       | -26495.59497 | -26495.59514 | -26496.13026   | -26496.10390 | -26496.10861   |
| 1.918       | -26495.59468 | -26495.59484 | -26496.13022   | -26496.10352 | -26496.10822   |
|             |              |              | $2^1\Delta$    |              |                |
| 1.780       | -26495.56094 | -26495.56075 | -26496.10338   | -26496.01603 | -26496.07224   |
| 1.790       | -26495.56263 | -26495.56245 | -26496.10535   |              |                |
| 1.800       | -26495.56412 | -26495.56394 | -26496.10711   | -26496.01932 | -26496.07542   |
| 1.810       | -26495.56541 | -26495.56522 | -26496.10868   | -26496.02065 | -26496.07670   |
| 1.820       |              |              |                |              |                |
| 1.830       | -26495.56740 | -26495.56723 | -26496.11126   | -26496.02275 | -26496.07869   |
| 1.840       | -26495.56813 | -26495.56795 | -26496.11230   | -26496.02352 | -26496.07942   |
| 1.850       | -26495.56868 | -26495.56851 | -26496.11317   | -26496.02412 | -26496.07997   |
| 1.860       | -26495.56907 | -26495.56890 | -26496.11389   |              |                |
| 1.870       | -26495.56929 | -26495.56912 | -26496.11447   | -26496.02483 | -26496.08058   |
| 1.880       | -26495.56936 | -26495.56919 | -26496.11490   |              |                |
| 1.890       | -26495.56928 | -26495.56911 | -26496.11520   | -26496.02494 | -26496.08059   |
| 1.900       | -26495.56906 | -26495.56889 | -26496.11535   | -26496.02477 | -26496.08038   |
| 1.908       | -26495.56878 | -26495.56862 | -26496.11543   | -26496.02455 | -26496.08012   |
| 1.918       | -26495.56831 | -26495.56815 | -26496.11540   |              |                |
|             |              |              | $1^1\Pi$       |              |                |
| 1.780       | -26495.57737 | -26495.57750 | -26496.11997   |              |                |
| 1.790       | -26495.57911 | -26495.57923 | -26496.12191   |              |                |
| 1.800       | -26495.58064 | -26495.58075 | -26496.12365   | -26496.10985 | -26496.11539   |
| 1.810       | -26495.58197 | -26495.58207 | -26496.12518   | -26496.11122 | -26496.11676   |
| 1.820       |              |              |                | -26496.11239 | -26496.11793   |
| 1.830       | -26495.58404 | -26495.58412 | -26496.12768   | -26496.11337 | -26496.11892   |
| 1.840       | -26495.58479 | -26495.58486 | -26496.12866   | -26496.11417 | -26496.11972   |
| 1.850       | -26495.58538 | -26495.58543 | -26496.12948   | -26496.11480 | -26496.12035   |
| 1.860       | -26495.58579 | -26495.58583 | -26496.13013   | -26496.11526 | -26496.12081   |
| 1.870       | -26495.58604 | -26495.58607 | -26496.13063   | -26496.11557 | -26496.12111   |
| 1.880       | -26495.58613 | -26495.58615 | -26496.13098   |              |                |
| 1.890       | -26495.58607 | -26495.58608 | -26496.13119   | -26496.11572 | -26496.12127   |
| 1.900       | -26495.58586 | -26495.58586 | -26496.13126   | -26496.11558 | -26496.12113   |
| 1.908       | -26495.58560 | -26495.58559 | -26496.13123   | -26496.11537 | -26496.12092   |
| 1.918       | -26495.58514 | -26495.58512 | -26496.13108   | -26496.11500 | -26496.12054   |

Table S10: Excitation energies [eV] of ThO for different states and various CC methods. In all pCCD-based methods, no symmetry constraints were imposed ( $C_1$  symmetry), while in all conventional CC methods  $C_{2v}$  symmetry was imposed.

| Distance[Å] | EOM-pCCD+S | EOM-pCCD-CCS | EOM-pCCD-LCCSD | EOM-CCSD | CR-EOM-CCSD(T) |
|-------------|------------|--------------|----------------|----------|----------------|
| $1^1\Delta$ |            |              |                |          |                |
| 1.780       | 2.05       | 2.07         | 1.59           | 1.41     | 1.30           |
| 1.790       | 2.05       | 2.06         | 1.59           |          |                |
| 1.800       | 2.05       | 2.06         | 1.59           | 1.40     | 1.30           |
| 1.810       | 2.04       | 2.06         | 1.58           | 1.40     | 1.29           |
| 1.820       |            |              |                |          |                |
| 1.830       | 2.04       | 2.05         | 1.58           | 1.39     | 1.29           |
| 1.840       | 2.03       | 2.05         | 1.58           | 1.39     | 1.28           |
| 1.850       | 2.03       | 2.04         | 1.57           | 1.38     | 1.28           |
| 1.860       | 2.03       | 2.04         | 1.57           | 1.38     | 1.27           |
| 1.870       | 2.02       | 2.03         | 1.57           | 1.37     | 1.27           |
| 1.880       | 2.02       | 2.03         | 1.56           |          |                |
| 1.890       | 2.01       | 2.02         | 1.56           | 1.36     | 1.26           |
| 1.900       | 2.01       | 2.02         | 1.56           | 1.36     | 1.26           |
| 1.908       | 2.01       | 2.02         | 1.55           | 1.35     | 1.25           |
| 1.918       | 2.00       | 2.01         | 1.55           | 1.35     | 1.25           |
| $1^1\Sigma$ |            |              |                |          |                |
| 1.780       | 2.73       | 2.72         | 2.42           | 2.47     | 2.34           |
| 1.790       | 2.71       | 2.71         | 2.40           |          |                |
| 1.800       | 2.70       | 2.69         | 2.39           | 2.45     | 2.32           |
| 1.810       | 2.68       | 2.67         | 2.38           | 2.44     | 2.31           |
| 1.820       |            |              |                |          |                |
| 1.830       | 2.65       | 2.64         | 2.35           | 2.41     | 2.28           |
| 1.840       | 2.63       | 2.62         | 2.34           | 2.40     | 2.27           |
| 1.850       | 2.61       | 2.61         | 2.33           | 2.38     | 2.26           |
| 1.860       | 2.59       | 2.59         | 2.31           | 2.37     | 2.24           |
| 1.870       | 2.58       | 2.57         | 2.30           | 2.36     | 2.23           |
| 1.880       | 2.56       | 2.55         | 2.29           |          |                |
| 1.890       | 2.54       | 2.54         | 2.27           | 2.33     | 2.20           |
| 1.900       | 2.52       | 2.52         | 2.26           | 2.32     | 2.19           |
| 1.908       | 2.51       | 2.50         | 2.25           | 2.31     | 2.18           |
| 1.918       | 2.49       | 2.49         | 2.24           | 2.29     | 2.17           |
| $2^1\Delta$ |            |              |                |          |                |
| 1.780       | 3.38       | 3.39         | 2.81           | 4.63     | 3.10           |
| 1.790       | 3.37       | 3.37         | 2.80           |          |                |
| 1.800       | 3.36       | 3.36         | 2.79           | 4.60     | 3.08           |
| 1.810       | 3.35       | 3.35         | 2.78           | 4.59     | 3.07           |
| 1.820       |            |              |                |          |                |
| 1.830       | 3.32       | 3.33         | 2.75           | 4.57     | 3.04           |
| 1.840       | 3.31       | 3.31         | 2.74           | 4.55     | 3.03           |
| 1.850       | 3.30       | 3.30         | 2.73           | 4.54     | 3.02           |
| 1.860       | 3.28       | 3.29         | 2.72           |          |                |
| 1.870       | 3.27       | 3.28         | 2.70           | 4.52     | 3.00           |
| 1.880       | 3.26       | 3.26         | 2.69           |          |                |
| 1.890       | 3.24       | 3.25         | 2.68           | 4.49     | 2.98           |
| 1.900       | 3.23       | 3.24         | 2.67           | 4.48     | 2.96           |
| 1.908       | 3.22       | 3.23         | 2.65           | 4.47     | 2.95           |
| 1.918       | 3.21       | 3.21         | 2.64           |          |                |
| $1^1\Pi$    |            |              |                |          |                |
| 1.780       | 2.93       | 2.93         | 2.36           |          |                |
| 1.790       | 2.92       | 2.92         | 2.35           |          |                |
| 1.800       | 2.91       | 2.90         | 2.34           | 2.14     | 1.99           |
| 1.810       | 2.90       | 2.89         | 2.33           | 2.13     | 1.98           |
| 1.820       | 0.00       |              | 0.00           | 2.11     |                |
| 1.830       | 2.87       | 2.87         | 2.31           | 2.10     | 1.95           |
| 1.840       | 2.86       | 2.85         | 2.30           | 2.09     | 1.94           |
| 1.850       | 2.84       | 2.84         | 2.29           | 2.07     | 1.92           |
| 1.860       | 2.83       | 2.83         | 2.27           | 2.06     | 1.91           |
| 1.870       | 2.82       | 2.81         | 2.26           | 2.05     | 1.90           |
| 1.880       | 2.80       | 2.80         | 2.25           |          |                |
| 1.890       | 2.79       | 2.79         | 2.24           | 2.02     | 1.87           |
| 1.900       | 2.77       | 2.77         | 2.23           | 2.01     | 1.85           |
| 1.908       | 2.76       | 2.76         | 2.22           | 1.99     | 1.84           |
| 1.918       | 2.75       | 2.75         | 2.21           | 1.98     | 1.83           |



## S6 ThS

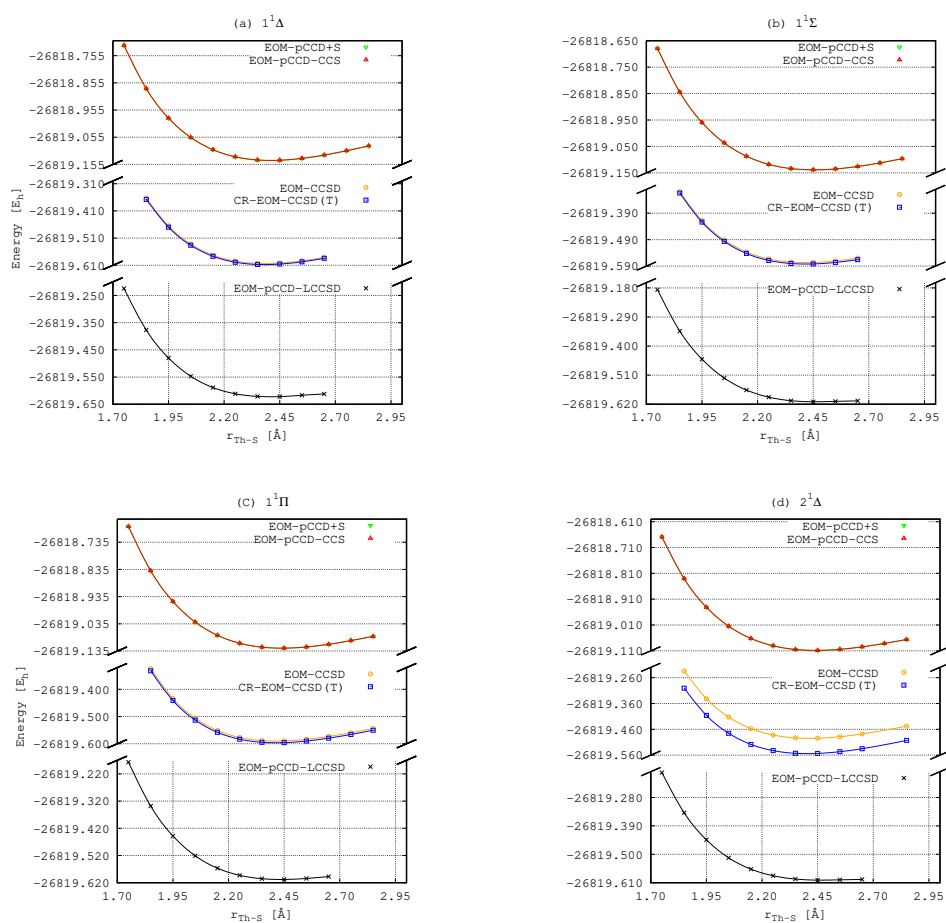

Figure S6: Potential energy surfaces of the lowest-lying excited states of ThS determined for various EOM-CC methods. In all pCCD-based methods, no symmetry constraints were imposed ( $C_1$  symmetry), while in all conventional CC methods  $C_{2v}$  symmetry was imposed.

Table S11: Total electronic energies  $[E_h]$  of ThS for different states and various CC methods. In all pCCD-based methods, no symmetry constraints were imposed ( $C_1$  symmetry), while in all conventional CC methods  $C_{2v}$  symmetry was imposed.

| Distance[Å]   | pCCD         | pCCD-CCS     | pCCD-LCCSD     | CCSD         |                |
|---------------|--------------|--------------|----------------|--------------|----------------|
| $X^1\Sigma^+$ |              |              |                |              |                |
| 1.75          | -26818.79109 | -26818.79109 | -26819.28533   |              |                |
| 1.85          | -26818.95340 | -26818.95340 | -26819.44122   | -26819.41836 |                |
| 1.95          | -26819.06278 | -26819.06278 | -26819.54446   | -26819.52127 |                |
| 2.05          | -26819.13299 | -26819.13299 | -26819.61056   | -26819.58672 |                |
| 2.15          | -26819.17619 | -26819.17619 | -26819.65022   | -26819.62540 |                |
| 2.25          | -26819.20012 | -26819.20012 | -26819.67115   | -26819.64495 |                |
| 2.35          | -26819.20946 | -26819.20945 | -26819.67912   | -26819.65089 |                |
| 2.45          | -26819.20819 | -26819.20818 | -26819.67849   | -26819.64726 |                |
| 2.55          | -26819.19924 | -26819.19924 | -26819.67293   | -26819.63707 |                |
| 2.65          | -26819.18493 | -26819.18492 | -26819.66727   | -26819.62253 |                |
| 2.75          | -26819.16717 | -26819.16716 |                | -26819.60525 |                |
| 2.85          | -26819.14756 | -26819.14755 |                | -26819.58645 |                |
| Distance[Å]   | EOM-pCCD+S   | EOM-pCCD-CCS | EOM-pCCD-LCCSD | EOM-CCSD     | CR-EOM-CCSD(T) |
| $1^1\Delta$   |              |              |                |              |                |
| 1.75          | -26818.71747 | -26818.71737 | -26819.22449   |              |                |
| 1.85          | -26818.87673 | -26818.87649 | -26819.37707   | -26819.36253 | -26819.36774   |
| 1.95          | -26818.98506 | -26818.98484 | -26819.47994   | -26819.46501 | -26819.47000   |
| 2.05          | -26819.05612 | -26819.05590 | -26819.54720   | -26819.53172 | -26819.53648   |
| 2.15          | -26819.10110 | -26819.10088 | -26819.58866   | -26819.57251 | -26819.57702   |
| 2.25          | -26819.12722 | -26819.12699 | -26819.61154   | -26819.59450 | -26819.59877   |
| 2.35          | -26819.13934 | -26819.13859 | -26819.62118   | -26819.60292 | -26819.60696   |
| 2.45          | -26819.13990 | -26819.13957 | -26819.62183   | -26819.60168 | -26819.60549   |
| 2.55          | -26819.13317 | -26819.13278 | -26819.61701   | -26819.59370 | -26819.59727   |
| 2.65          | -26819.12094 | -26819.12049 | -26819.61218   | -26819.58115 | -26819.58451   |
| 2.75          | -26819.10514 | -26819.10458 |                |              |                |
| 2.85          | -26819.08736 | -26819.08666 |                | -26819.54849 | -26819.55147   |
| $1^1\Sigma$   |              |              |                |              |                |
| 1.75          | -26818.67960 | -26818.67952 | -26819.18675   |              |                |
| 1.85          | -26818.84451 | -26818.84447 | -26819.34316   | -26819.30889 | -26819.31384   |
| 1.95          | -26818.95947 | -26818.95946 | -26819.44960   | -26819.41821 | -26819.42355   |
| 2.05          | -26819.03659 | -26819.03657 | -26819.52094   | -26819.49099 | -26819.49653   |
| 2.15          | -26819.08697 | -26819.08694 | -26819.56651   | -26819.53678 | -26819.54239   |
| 2.25          | -26819.11783 | -26819.11779 | -26819.59320   | -26819.56284 | -26819.56845   |
| 2.35          | -26819.13374 | -26819.13368 | -26819.60656   | -26819.57460 | -26819.58020   |
| 2.45          | -26819.13857 | -26819.13849 | -26819.61067   | -26819.57613 | -26819.58174   |
| 2.55          | -26819.13515 | -26819.13508 | -26819.60917   | -26819.57047 | -26819.57611   |
| 2.65          | -26819.12575 | -26819.12571 | -26819.60727   | -26819.55991 | -26819.56563   |
| 2.75          | -26819.11228 | -26819.11231 |                |              |                |
| 2.85          | -26819.09633 | -26819.09646 |                | -26819.53041 | -26819.53656   |
| $2^1\Delta$   |              |              |                |              |                |
| 1.75          | -26818.66899 | -26818.66887 | -26819.18369   |              |                |
| 1.85          | -26818.83089 | -26818.83070 | -26819.33931   | -26819.23398 | -26819.30085   |
| 1.95          | -26818.94150 | -26818.94134 | -26819.44410   | -26819.34166 | -26819.40609   |
| 2.05          | -26819.01489 | -26819.01473 | -26819.51365   | -26819.41266 | -26819.47532   |
| 2.15          | -26819.06218 | -26819.06204 | -26819.55761   | -26819.45709 | -26819.51845   |
| 2.25          | -26819.09068 | -26819.09054 | -26819.58317   | -26819.48222 | -26819.54258   |
| 2.35          | -26819.10485 | -26819.10472 | -26819.59592   | -26819.49338 | -26819.55291   |
| 2.45          | -26819.10850 | -26819.10836 | -26819.60002   | -26819.49452 | -26819.55330   |
| 2.55          | -26819.10440 | -26819.10425 | -26819.59898   | -26819.48860 | -26819.54662   |
| 2.65          | -26819.09478 | -26819.09463 | -26819.59745   | -26819.47781 | -26819.53501   |
| 2.75          | -26819.08155 | -26819.08138 |                |              |                |
| 2.85          | -26819.06630 | -26819.06608 |                | -26819.44784 | -26819.50292   |
| $1^1\Pi$      |              |              |                |              |                |
| 1.75          | -26818.67710 | -26818.67686 | -26819.17673   |              |                |
| 1.85          | -26818.84018 | -26818.83997 | -26819.33835   | -26819.32377 | -26819.33185   |
| 1.95          | -26818.95328 | -26818.95305 | -26819.44840   | -26819.43372 | -26819.44113   |
| 2.05          | -26819.02880 | -26819.02855 | -26819.52112   | -26819.50611 | -26819.51312   |
| 2.15          | -26819.07746 | -26819.07720 | -26819.56683   | -26819.55134 | -26819.55808   |
| 2.25          | -26819.10663 | -26819.10636 | -26819.59306   | -26819.57691 | -26819.58347   |
| 2.35          | -26819.12110 | -26819.12080 | -26819.60542   | -26819.58831 | -26819.59474   |
| 2.45          | -26819.12475 | -26819.12444 | -26819.60812   | -26819.58959 | -26819.59596   |
| 2.55          | -26819.12046 | -26819.12014 | -26819.60442   | -26819.58379 | -26819.59014   |
| 2.65          | -26819.11053 | -26819.11022 | -26819.59744   | -26819.57319 | -26819.57956   |
| 2.75          | -26819.09693 | -26819.09663 |                | -26819.55947 | -26819.56591   |
| 2.85          | -26819.08133 | -26819.08103 |                | -26819.54393 | -26819.55047   |

Table S12: Excitation energies [eV] of ThS for different states and various CC methods. In all pCCD-based methods, no symmetry constraints were imposed ( $C_1$  symmetry), while in all conventional CC methods  $C_{2v}$  symmetry was imposed.

| Distance[Å] | EOM-pCCD+S | EOM-pCCD-CCS | EOM-pCCD-LCCSD | EOM-CCSD | CR-EOM-CCSD(T) |
|-------------|------------|--------------|----------------|----------|----------------|
| $1^1\Delta$ |            |              |                |          |                |
| 1.75        | 2.00       | 2.01         | 1.66           |          |                |
| 1.85        | 2.09       | 2.09         | 1.75           | 1.52     | 1.38           |
| 1.95        | 2.11       | 2.12         | 1.76           | 1.53     | 1.40           |
| 2.05        | 2.09       | 2.10         | 1.72           | 1.50     | 1.37           |
| 2.15        | 2.04       | 2.05         | 1.68           | 1.44     | 1.32           |
| 2.25        | 1.98       | 1.99         | 1.62           | 1.37     | 1.26           |
| 2.35        | 1.91       | 1.93         | 1.58           | 1.31     | 1.20           |
| 2.45        | 1.86       | 1.87         | 1.54           | 1.24     | 1.14           |
| 2.55        | 1.80       | 1.81         | 1.52           | 1.18     | 1.08           |
| 2.65        | 1.74       | 1.75         | 1.50           | 1.13     | 1.03           |
| 2.75        | 1.69       | 1.70         |                |          |                |
| 2.85        | 1.64       | 1.66         |                | 1.03     | 0.95           |
| $1^1\Sigma$ |            |              |                |          |                |
| 1.75        | 3.03       | 3.04         | 2.68           |          |                |
| 1.85        | 2.96       | 2.96         | 2.67           | 2.98     | 2.84           |
| 1.95        | 2.81       | 2.81         | 2.58           | 2.80     | 2.66           |
| 2.05        | 2.62       | 2.62         | 2.44           | 2.60     | 2.45           |
| 2.15        | 2.43       | 2.43         | 2.28           | 2.41     | 2.26           |
| 2.25        | 2.24       | 2.24         | 2.12           | 2.23     | 2.08           |
| 2.35        | 2.06       | 2.06         | 1.97           | 2.08     | 1.92           |
| 2.45        | 1.89       | 1.90         | 1.85           | 1.94     | 1.78           |
| 2.55        | 1.74       | 1.75         | 1.74           | 1.81     | 1.66           |
| 2.65        | 1.61       | 1.61         | 1.63           | 1.70     | 1.55           |
| 2.75        | 1.49       | 1.49         |                |          |                |
| 2.85        | 1.39       | 1.39         |                | 1.52     | 1.36           |
| $2^1\Delta$ |            |              |                |          |                |
| 1.75        | 3.32       | 3.33         | 2.77           |          |                |
| 1.85        | 3.33       | 3.34         | 2.77           | 5.02     | 3.20           |
| 1.95        | 3.30       | 3.30         | 2.73           | 4.89     | 3.13           |
| 2.05        | 3.21       | 3.22         | 2.64           | 4.74     | 3.03           |
| 2.15        | 3.10       | 3.11         | 2.52           | 4.58     | 2.91           |
| 2.25        | 2.98       | 2.98         | 2.39           | 4.43     | 2.79           |
| 2.35        | 2.85       | 2.85         | 2.26           | 4.29     | 2.67           |
| 2.45        | 2.71       | 2.72         | 2.14           | 4.16     | 2.56           |
| 2.55        | 2.58       | 2.58         | 2.01           | 4.04     | 2.46           |
| 2.65        | 2.45       | 2.46         | 1.90           | 3.94     | 2.38           |
| 2.75        | 2.33       | 2.33         |                |          |                |
| 2.85        | 2.21       | 2.22         |                | 3.77     | 2.27           |
| $1^1\Pi$    |            |              |                |          |                |
| 1.75        | 3.10       | 3.11         | 2.96           |          |                |
| 1.85        | 3.08       | 3.09         | 2.80           | 2.57     | 2.35           |
| 1.95        | 2.98       | 2.99         | 2.61           | 2.38     | 2.18           |
| 2.05        | 2.84       | 2.84         | 2.43           | 2.19     | 2.00           |
| 2.15        | 2.69       | 2.69         | 2.27           | 2.02     | 1.83           |
| 2.25        | 2.54       | 2.55         | 2.12           | 1.85     | 1.67           |
| 2.35        | 2.40       | 2.41         | 2.01           | 1.70     | 1.53           |
| 2.45        | 2.27       | 2.28         | 1.91           | 1.57     | 1.40           |
| 2.55        | 2.14       | 2.15         | 1.86           | 1.45     | 1.28           |
| 2.65        | 2.02       | 2.03         | 1.90           | 1.34     | 1.17           |
| 2.75        | 1.91       | 1.92         |                | 1.25     | 1.07           |
| 2.85        | 1.80       | 1.81         |                | 1.16     | 0.98           |

## S7 Error measures for total electronic energies and excitation energies

Table S13: Error measures [eV] for excitation energies along the potential energy surfaces of the lowest-lying excited states of ThO, ThS,  $\text{UO}_2^{2+}$ , NUN,  $\text{PaO}_2^+$ , and  $\text{ThO}_2$  determined for various EOM-CC methods with respect to CR-EOM-CCSD(T).

| State              | EOM-pCCD+S    |       |       |       | EOM-pCCD-CCS |       |       |       | EOM-pCCD-LCCSD |       |       |        | EOM-CCSD |       |       |        |       |
|--------------------|---------------|-------|-------|-------|--------------|-------|-------|-------|----------------|-------|-------|--------|----------|-------|-------|--------|-------|
|                    | NPE           | MAE   | ME    | RME   | NPE          | MAE   | ME    | RME   | NPE            | MAE   | ME    | RME    | NPE      | MAE   | ME    | RME    |       |
| ThS                | $1^1\Delta$   | 0.041 | 0.727 | 0.715 | 0.715        | 0.028 | 0.733 | 0.725 | 0.725          | 0.107 | 0.465 | 0.389  | 0.391    | 0.061 | 0.142 | 0.113  | 0.114 |
|                    | $1^1\Pi$      | 0.150 | 0.876 | 0.838 | 0.839        | 0.152 | 0.884 | 0.846 | 0.847          | 0.300 | 0.731 | 0.501  | 0.510    | 0.047 | 0.220 | 0.202  | 0.184 |
|                    | $1^1\Sigma$   | 0.133 | 0.169 | 0.120 | 0.128        | 0.137 | 0.170 | 0.120 | 0.128          | 0.160 | 0.176 | 0.067  | 0.081    | 0.033 | 0.167 | 0.152  | 0.152 |
|                    | $2^1\Delta$   | 0.131 | 0.192 | 0.146 | 0.153        | 0.140 | 0.196 | 0.149 | 0.156          | 0.091 | 0.481 | 0.418  | 0.419    | 0.321 | 1.820 | 1.644  | 1.647 |
| ThO                | $1^1\Delta$   | 0.004 | 0.753 | 0.752 | 0.752        | 0.002 | 0.765 | 0.764 | 0.764          | 0.015 | 0.303 | 0.295  | 0.296    | 0.008 | 0.108 | 0.104  | 0.104 |
|                    | $1^1\Pi$      | 0.003 | 0.920 | 0.919 | 0.919        | 0.007 | 0.920 | 0.917 | 0.917          | 0.037 | 0.383 | 0.365  | 0.365    | 0.000 | 0.151 | 0.150  | 0.150 |
|                    | $1^1\Sigma$   | 0.062 | 0.387 | 0.354 | 0.355        | 0.060 | 0.380 | 0.348 | 0.349          | 0.003 | 0.074 | -0.072 | 0.072    | 0.003 | 0.131 | 0.129  | 0.129 |
|                    | $2^1\Delta$   | 0.014 | 0.281 | 0.274 | 0.274        | 0.015 | 0.286 | 0.279 | 0.279          | 0.015 | 0.301 | -0.293 | 0.293    | 0.017 | 1.530 | 1.520  | 1.520 |
| $\text{UO}_2^{2+}$ | $1^1\Phi_g$   | 0.406 | 1.341 | 1.046 | 1.068        | 0.602 | 1.299 | 1.002 | 1.021          | 0.337 | 0.371 | 0.169  | 0.200    | 0.154 | 0.262 | -0.190 | 0.196 |
|                    | $1^1\Delta_g$ | 0.670 | 1.526 | 1.195 | 1.214        | 0.532 | 1.388 | 1.133 | 1.146          | 0.341 | 0.363 | 0.158  | 0.191    | 0.229 | 0.348 | -0.226 | 0.237 |
|                    | $1^1\Gamma_g$ | 0.328 | 3.586 | 3.448 | 3.449        | 0.156 | 3.407 | 3.310 | 3.310          | 0.733 | 0.741 | 0.322  | 0.391    | 0.155 | 0.506 | -0.434 | 0.436 |
|                    | $2^1\Delta_g$ | 0.316 | 3.623 | 3.478 | 3.481        | 0.246 | 3.466 | 3.353 | 3.354          | 0.639 | 0.706 | 0.326  | 0.386    | 0.099 | 0.456 | -0.421 | 0.422 |
|                    | $2^1\Phi_g$   | 0.365 | 3.318 | 3.154 | 3.157        | 0.154 | 3.103 | 3.021 | 3.021          | 0.721 | 0.739 | 0.310  | 0.384    | 0.158 | 0.500 | -0.427 | 0.430 |
|                    | $1^1\Pi_g$    | 0.355 | 3.417 | 3.258 | 3.260        | 0.153 | 3.209 | 3.124 | 3.125          | 0.775 | 0.792 | 0.333  | 0.412    | 0.157 | 0.495 | -0.423 | 0.426 |
| NUN                | $1^1\Delta_g$ | 0.235 | 0.879 | 0.760 | 0.764        | 0.261 | 0.923 | 0.790 | 0.795          | 0.132 | 0.217 | 0.141  | 0.148    | 0.177 | 0.209 | -0.112 | 0.125 |
|                    | $1^1\Phi_g$   | 0.269 | 0.772 | 0.635 | 0.641        | 0.290 | 0.811 | 0.661 | 0.668          | 0.144 | 0.229 | 0.148  | 0.155    | 0.064 | 0.086 | -0.056 | 0.059 |
|                    | $2^1\Phi_g$   | 1.901 | 2.201 | 2.156 | 2.156        | 0.152 | 2.296 | 2.223 | 2.224          | 0.314 | 0.483 | 0.297  | 0.314    | 0.111 | 0.324 | -0.270 | 0.272 |
|                    | $1^1\Pi_g$    | 0.030 | 2.399 | 2.384 | 2.384        | 0.086 | 2.492 | 2.448 | 2.448          | 0.338 | 0.511 | 0.312  | 0.331    | 0.115 | 0.334 | -0.278 | 0.280 |
|                    | $1^1\Sigma_u$ | 0.025 | 2.021 | 2.009 | 2.009        | 0.035 | 1.988 | 1.972 | 1.972          | 0.453 | 1.008 | 0.736  | 0.750    | 0.163 | 0.604 | 0.522  | 0.525 |
|                    | $1^1\Delta_u$ | 0.160 | 1.286 | 1.189 | 1.191        | 0.165 | 1.267 | 1.168 | 1.384          | 0.183 | 0.323 | 0.215  | 0.223    | 0.358 | 0.398 | -0.116 | 0.240 |
| $\text{PaO}_2^+$   | $1^1\Phi_g$   | 0.751 | 1.775 | 1.452 | 1.478        | 0.905 | 1.949 | 1.481 | 1.508          | 0.241 | 0.288 | 0.143  | 0.163    | 0.192 | 0.279 | -0.184 | 0.194 |
|                    | $1^1\Delta_g$ | 0.793 | 1.909 | 1.515 | 1.536        | 0.846 | 1.983 | 1.546 | 1.569          | 0.239 | 0.279 | 0.135  | 0.156    | 0.203 | 0.283 | -0.184 | 0.195 |
|                    | $1^1\Sigma_u$ | 0.276 | 1.696 | 1.557 | 1.560        | 0.295 | 1.707 | 1.557 | 1.560          | 0.166 | 0.523 | 0.433  | 0.196    | 0.068 | 0.238 | 0.211  | 0.213 |
|                    | $1^1\Delta_u$ | 0.490 | 1.618 | 1.373 | 1.382        | 0.517 | 1.644 | 1.380 | 1.390          | 0.152 | 0.428 | 0.342  | 0.345    | 0.135 | 0.153 | 0.096  | 0.105 |
|                    | $1^1\Pi_g$    | 0.483 | 1.375 | 1.129 | 1.140        | 0.526 | 1.429 | 1.159 | 1.172          | 0.188 | 0.439 | 0.323  | 0.327    | 0.232 | 0.234 | -0.053 | 0.112 |
| ThO <sub>2</sub>   | $1^1A_1$      | 0.745 | 2.615 | 2.261 | 2.273        | 0.810 | 2.694 | 2.285 | 2.297          | 0.647 | 0.781 | 0.287  | 0.347    | 0.078 | 0.138 | -0.117 | 0.120 |
|                    | $1^1B_2$      | 1.309 | 2.802 | 2.176 | 2.215        | 1.384 | 2.887 | 2.208 | 2.251          | 0.473 | 0.621 | 0.259  | 0.297    | 0.173 | 0.182 | -0.121 | 0.133 |
|                    | $1^1B_1$      | 0.268 | 2.424 | 2.278 | 2.280        | 0.302 | 2.476 | 2.316 | 2.318          | 0.432 | 0.543 | 0.236  | 0.270    | 0.033 | 0.144 | -0.133 | 0.134 |
|                    | $1^1A_2$      | 1.871 | 3.271 | 2.224 | 2.298        | 1.712 | 3.127 | 2.229 | 2.296          | 0.896 | 1.043 | 0.368  | 0.466    | 0.120 | 0.136 | -0.133 | 0.105 |

Table S14: Error measures [eV] for adiabatic excitations energies of ThO and ThS determined for all excited states within a given method with respect to CR-EOM-CCSD(T).

| Method         | ThO   |       |       |       | ThS   |       |       |       |
|----------------|-------|-------|-------|-------|-------|-------|-------|-------|
|                | NPE   | MAE   | ME    | RME   | NPE   | MAE   | ME    | RME   |
| EOM-pCCD+S     | 0.640 | 0.920 | 0.575 | 0.636 | 0.770 | 0.840 | 0.435 | 0.552 |
| EOM-pCCD-CCS   | 0.640 | 0.920 | 0.578 | 0.639 | 0.780 | 0.850 | 0.443 | 0.562 |
| EOM-pCCD-LCCSD | 0.300 | 0.340 | 0.088 | 0.276 | 0.460 | 0.470 | 0.100 | 0.380 |
| EOM-CCSD       | 1.410 | 1.510 | 0.473 | 0.763 | 1.500 | 1.610 | 0.510 | 0.815 |

Table S15: Error measures [eV] for adiabatic excitations energies of  $\text{UO}_2^{2+}$ , NUN,  $\text{PaO}_2^+$ , and  $\text{ThO}_2$  determined for all excited states within a given method with respect to CR-EOM-CCSD(T).

| State          | $\text{UO}_2^{2+}$ |       |        |       | NUN   |       |        |       | $\text{PaO}_2^+$ |       |        |       | $\text{ThO}_2$ |       |        |       |
|----------------|--------------------|-------|--------|-------|-------|-------|--------|-------|------------------|-------|--------|-------|----------------|-------|--------|-------|
|                | NPE                | MAE   | ME     | RME   | NPE   | MAE   | ME     | RME   | NPE              | MAE   | ME     | RME   | NPE            | MAE   | ME     | RME   |
| EOM-pCCD+S     | 2.640              | 3.680 | 2.688  | 2.914 | 1.830 | 2.540 | 1.628  | 1.781 | 0.320            | 1.620 | 1.484  | 1.489 | 0.160          | 2.320 | 2.238  | 2.239 |
| EOM-pCCD-CCS   | 2.740              | 3.810 | 2.800  | 3.039 | 1.860 | 2.590 | 1.643  | 1.799 | 0.320            | 1.650 | 1.502  | 1.507 | 0.180          | 2.360 | 2.260  | 2.261 |
| EOM-pCCD-LCCSD | 0.090              | 0.100 | -0.050 | 0.060 | 0.550 | 0.570 | 0.082  | 0.274 | 0.310            | 0.330 | 0.128  | 0.190 | 0.070          | 0.190 | 0.155  | 0.157 |
| EOM-CCSD       | 0.270              | 0.460 | -0.362 | 0.380 | 0.440 | 0.490 | -0.030 | 0.264 | 0.220            | 0.310 | -0.026 | 0.202 | 0.020          | 0.140 | -0.133 | 0.133 |

Table S16: Error measures [eV] for total electronic energies along the potential energy surfaces for different states of  $\text{UO}_2^{2+}$ , NUN,  $\text{PaO}_2^+$ ,  $\text{ThO}_2$ , ThO, and ThS determined for various EOM-CC methods with respect to CR-EOM-CCSD(T). pCCD/EOM-pCCD+S indicates that pCCD has been employed for the ground state calculation, while EOM-pCCD+S was used to target excited states.

| State              | pCCD/EOM-pCCD+S |       |        | EOM-pCCD-CCS |        |        | EOM-pCCD-LCCSD |       |        | EOM-LCCSD |       |       |
|--------------------|-----------------|-------|--------|--------------|--------|--------|----------------|-------|--------|-----------|-------|-------|
|                    | NPE             | MAE   | RME    | NPE          | MAE    | RME    | NPE            | MAE   | RME    | NPE       | MAE   | RME   |
| $\text{UO}_2^{2+}$ | $X^1\Sigma^+$   | 0.549 | 16.124 | 15.869       | 16.12  | 15.864 | 15.865         | 2.011 | -1.420 | 1.458     | —     | —     |
|                    | $1^1\Phi_g$     | 0.702 | 17.422 | 16.913       | 17.414 | 16.866 | 16.870         | 1.640 | -1.251 | 1.271     | 0.154 | 0.262 |
|                    | $1^1\Delta_g$   | 1.219 | 17.649 | 17.062       | 17.503 | 16.997 | 17.000         | 1.648 | -1.262 | 1.281     | 0.229 | 0.348 |
|                    | $1^1\Pi_g$      | 0.877 | 19.709 | 19.315       | 19.416 | 19.174 | 19.175         | 0.336 | -1.098 | 1.103     | 0.155 | 0.506 |
|                    | $2^1\Delta_g$   | 0.845 | 19.736 | 19.345       | 19.459 | 19.217 | 19.218         | 0.406 | -1.094 | 1.101     | 0.099 | 0.456 |
|                    | $1^1\Pi_g$      | 0.914 | 19.441 | 19.022       | 19.024 | 18.885 | 18.886         | 0.326 | -0.931 | 1.115     | 0.158 | 0.500 |
| NUN                | $X^1\Sigma^+$   | 0.409 | 0.590  | 0.583        | 0.409  | 0.590  | 0.583          | 0.659 | -1.248 | 1.267     | —     | —     |
|                    | $1^1\Delta_g$   | 0.537 | 16.942 | 16.676       | 16.987 | 16.706 | 16.707         | 1.421 | -1.167 | 1.177     | 0.177 | 0.209 |
|                    | $1^1\Phi_g$     | 0.571 | 16.835 | 16.551       | 16.552 | 16.577 | 16.578         | 0.458 | -1.161 | 1.170     | 0.064 | 0.086 |
|                    | $2^1\Phi_g$     | 0.403 | 18.265 | 18.072       | 18.073 | 18.359 | 18.139         | 1.816 | -1.011 | 1.016     | 0.111 | 0.324 |
|                    | $1^1\Pi_g$      | 0.279 | 18.463 | 18.326       | 18.335 | 18.556 | 18.390         | 0.264 | -0.996 | 1.000     | 0.115 | 0.334 |
|                    | $1^1\Sigma_u$   | 0.183 | 17.965 | 17.875       | 17.922 | 17.838 | 17.838         | 0.154 | -0.572 | 0.574     | 0.163 | 0.604 |
| $\text{PaO}_2^+$   | $1^1\Delta_u$   | 0.144 | 17.191 | 17.105       | 17.178 | 17.084 | 17.084         | 0.679 | -1.094 | 1.118     | 0.358 | 0.398 |
|                    | $X^1\Sigma^+$   | 0.181 | 14.740 | 14.678       | 15.915 | 15.604 | 15.571         | 0.454 | -1.062 | 1.072     | —     | —     |
|                    | $1^1\Phi_g$     | 0.879 | 16.503 | 16.131       | 16.134 | 16.161 | 16.165         | 0.212 | -0.918 | 0.921     | 0.192 | 0.279 |
|                    | $1^1\Delta_g$   | 0.932 | 16.649 | 16.193       | 16.728 | 16.229 | 16.229         | 0.215 | -1.026 | 0.929     | 0.203 | 0.283 |
|                    | $1^1\Sigma_u$   | 0.416 | 16.436 | 16.235       | 16.236 | 16.238 | 16.238         | 0.288 | -0.629 | 0.636     | 0.068 | 0.238 |
|                    | $1^1\Delta_u$   | 0.630 | 16.358 | 16.051       | 16.052 | 16.061 | 16.062         | 0.301 | -0.720 | 0.727     | 0.135 | 0.153 |
| ThO <sub>2</sub>   | $1^1\Pi_g$      | 0.622 | 16.114 | 15.807       | 15.809 | 15.840 | 15.841         | 0.266 | -0.739 | 0.745     | 0.232 | 0.234 |
|                    | $X^1A_1$        | 0.051 | 13.479 | 13.450       | 13.479 | 13.453 | 13.453         | 1.013 | -0.971 | 1.017     | —     | —     |
|                    | $1A_1$          | 0.715 | 16.064 | 15.712       | 16.148 | 15.738 | 15.739         | 0.242 | -0.621 | 0.625     | 0.078 | 0.138 |
|                    | $1B_2$          | 1.279 | 16.251 | 15.626       | 16.341 | 15.660 | 15.666         | 0.311 | -0.804 | 0.657     | 0.173 | 0.182 |
|                    | $1B_1$          | 0.260 | 15.873 | 15.729       | 15.729 | 15.930 | 15.768         | 0.349 | -0.673 | 0.680     | 0.033 | 0.144 |
|                    | $1A_2$          | 1.841 | 16.721 | 15.674       | 16.581 | 15.681 | 15.681         | 0.260 | -0.540 | 0.546     | 0.120 | 0.136 |
| ThO                | $X^1\Sigma^+$   | 0.018 | 13.650 | 13.640       | 13.650 | 13.640 | 13.640         | 0.108 | -0.617 | 0.618     | —     | —     |
|                    | $1^1\Delta$     | 0.022 | 14.403 | 14.392       | 14.392 | 14.404 | 14.404         | 0.357 | -0.321 | 0.323     | 0.008 | 0.108 |
|                    | $1^1\Pi$        | 0.020 | 14.569 | 14.559       | 14.559 | 14.557 | 14.557         | 0.279 | -0.252 | 0.253     | 0.000 | 0.151 |
|                    | $1^1\Sigma$     | 0.045 | 14.019 | 13.994       | 13.994 | 13.988 | 13.988         | 0.581 | -0.599 | 0.546     | 0.003 | 0.131 |
|                    | $2^1\Delta$     | 0.001 | 13.914 | 13.913       | 13.913 | 13.918 | 13.918         | 0.930 | -0.904 | 0.905     | 0.017 | 1.530 |
|                    | $X^1\Sigma^+$   | 0.744 | 12.652 | 12.132       | 12.652 | 12.132 | 12.674         | 0.595 | -1.217 | 0.789     | 0.811 | —     |
| ThS                | $1^1\Delta$     | 0.747 | 13.361 | 12.870       | 13.368 | 12.878 | 12.880         | 0.499 | -0.400 | 0.428     | 0.061 | 0.142 |
|                    | $1^1\Pi$        | 0.617 | 13.379 | 12.970       | 12.972 | 13.385 | 12.978         | 0.309 | -0.486 | 0.303     | 0.047 | 0.220 |
|                    | $1^1\Sigma$     | 0.801 | 12.771 | 12.273       | 12.273 | 12.277 | 12.277         | 1.133 | -0.782 | 0.795     | 0.033 | 0.167 |
|                    | $2^1\Delta$     | 0.907 | 12.789 | 12.286       | 12.286 | 12.291 | 12.291         | 0.665 | -1.207 | 1.225     | 0.321 | 1.644 |
|                    | $1^1\Delta$     | 0.022 | 14.403 | 14.392       | 14.392 | 14.404 | 14.404         | 0.357 | -0.321 | 0.323     | 0.008 | 0.108 |
|                    | $1^1\Pi$        | 0.020 | 14.569 | 14.559       | 14.559 | 14.557 | 14.557         | 0.279 | -0.252 | 0.253     | 0.000 | 0.151 |

## S8 Results for TZ-quality basis sets

We have employed the triple- $\zeta$  correlation consistent basis sets of Peterson<sup>6</sup> for all heavy elements (cc-pVTZ-DK3), optimized specifically for the DKH3 Hamiltonian,<sup>5,7,8</sup> and Dunning's aug-cc-pVTZ basis set for all light elements.<sup>9</sup>

Table S17: Vertical excitation energies of the lowest-lying states of NUN determined for a basis set of double- $\zeta$  ( $D\zeta$ ) and triple- $\zeta$  ( $T\zeta$ ) quality.

| Method         | $D\zeta$   | $T\zeta$   | $\Delta T_v$ [eV] |
|----------------|------------|------------|-------------------|
|                | $T_v$ [eV] | $T_v$ [eV] |                   |
| $1^1\Delta_g$  |            |            |                   |
| EOM-pCCD+S     | 3.97       | 4.03       | -0.06             |
| EOM-pCCD-CCS   | 4.00       | 4.05       | -0.05             |
| EOM-pCCD-LCCSD | 3.36       | 3.35       | +0.01             |
| $1^1\Phi_g$    |            |            |                   |
| EOM-pCCD+S     | 3.30       | 3.38       | -0.08             |
| EOM-pCCD-CCS   | 3.33       | 3.40       | -0.07             |
| EOM-pCCD-LCCSD | 2.82       | 2.82       | $\pm 0.00$        |
| $2^1\Phi_g$    |            |            |                   |
| EOM-pCCD+S     | 6.08       | 6.10       | -0.02             |
| EOM-pCCD-CCS   | 6.14       | 6.16       | -0.02             |
| EOM-pCCD-LCCSD | 4.15       | 4.29       | -0.14             |
| $1^1\Pi_g$     |            |            |                   |
| EOM-pCCD+S     | 6.46       | 6.48       | -0.02             |
| EOM-pCCD-CCS   | 6.51       | 6.53       | -0.02             |
| EOM-pCCD-LCCSD | 4.31       | 4.38       | -0.07             |
| $1^1\Sigma_u$  |            |            |                   |
| EOM-pCCD+S     | 4.82       | 4.85       | -0.03             |
| EOM-pCCD-CCS   | 4.78       | 4.81       | -0.03             |
| EOM-pCCD-LCCSD | 3.43       | 3.56       | -0.13             |
| $1^1\Delta_u$  |            |            |                   |
| EOM-pCCD-CCS   | 4.76       | 4.79       | -0.03             |
| EOM-pCCD-LCCSD | 3.81       | 3.85       | -0.04             |

Table S18: Vertical excitation energies of the lowest-lying states of  $\text{UO}_2^{2+}$  determined for a basis set of double- $\zeta$  ( $D\zeta$ ) and triple- $\zeta$  ( $T\zeta$ ) quality.

| Method         | $D\zeta$   | $T\zeta$   | $\Delta T_v$ [eV] |
|----------------|------------|------------|-------------------|
|                | $T_v$ [eV] | $T_v$ [eV] |                   |
| $1^1\Phi_g$    |            |            |                   |
| EOM-pCCD+S     | 4.62       | 4.63       | -0.01             |
| EOM-pCCD-CCS   | 4.66       | 4.67       | -0.01             |
| EOM-pCCD-LCCSD | 3.82       | 3.76       | +0.06             |
| EOM-CCSD       | 3.57       | 3.49       | +0.08             |
| CR-EOM-CCSD(T) | 3.73       | 3.59       | +0.14             |
| $1^1\Delta_g$  |            |            |                   |
| EOM-pCCD+S     | 5.15       | 5.16       | -0.01             |
| EOM-pCCD-CCS   | 5.21       | 5.20       | +0.01             |
| EOM-pCCD-LCCSD | 4.20       | 4.15       | +0.05             |
| EOM-CCSD       | 3.94       | 3.87       | +0.07             |
| CR-EOM-CCSD(T) | 4.12       | 3.99       | +0.13             |
| $1^1\Gamma_g$  |            |            |                   |
| EOM-pCCD+S     | 8.57       | 8.59       | -0.02             |
| EOM-pCCD-CCS   | 8.70       | 8.72       | -0.02             |
| EOM-pCCD-LCCSD | 5.46       | 5.43       | +0.03             |
| EOM-CCSD       | 4.89       | 4.86       | +0.03             |
| CR-EOM-CCSD(T) | 5.29       | 5.17       | +0.12             |
| $2^1\Delta_g$  |            |            |                   |
| EOM-pCCD+S     | 8.79       | 8.82       | -0.03             |
| EOM-pCCD-CCS   | 8.90       | 8.94       | -0.04             |
| EOM-pCCD-LCCSD | 5.72       | 5.67       | +0.05             |
| EOM-CCSD       | 5.14       | 5.11       | +0.03             |
| CR-EOM-CCSD(T) | 5.55       | 5.41       | +0.14             |
| $2^1\Phi_g$    |            |            |                   |
| EOM-pCCD+S     | 8.03       | 8.06       | -0.03             |
| EOM-pCCD-CCS   | 8.15       | 8.18       | -0.03             |
| EOM-pCCD-LCCSD | 5.20       | 5.19       | +0.01             |
| EOM-CCSD       | 4.65       | 4.63       | +0.02             |
| CR-EOM-CCSD(T) | 5.05       | 4.94       | +0.11             |
| $1^1\Pi_g$     |            |            |                   |
| EOM-pCCD+S     | 8.21       | 8.25       | -0.04             |
| EOM-pCCD-CCS   | 8.33       | 8.37       | -0.04             |
| EOM-pCCD-LCCSD | 5.30       | 5.31       | +0.01             |
| EOM-CCSD       | 4.73       | 4.72       | +0.01             |
| CR-EOM-CCSD(T) | 5.13       | 5.02       | +0.11             |

Table S19: Vertical excitation energies of the lowest-lying states of ThO<sub>2</sub> determined for a basis set of double- $\zeta$  ( $D\zeta$ ) and triple- $\zeta$  ( $T\zeta$ ) quality.

| Method         | $D\zeta$   | $T\zeta$   | $\Delta T_v$ [eV] |
|----------------|------------|------------|-------------------|
|                | $T_v$ [eV] | $T_v$ [eV] |                   |
|                | $a_1$      |            |                   |
| EOM-pCCD+S     | 5.45       | 5.50       | -0.05             |
| EOM-pCCD-CCS   | 5.48       | 5.53       | -0.05             |
| EOM-pCCD-LCCSD | 3.40       | 3.55       | -0.15             |
| EOM-CCSD       | 3.05       | 3.28       | -0.23             |
| CR-EOM-CCSD(T) | 3.18       | 3.36       | -0.18             |
|                | $b_2$      |            |                   |
| EOM-pCCD+S     | 4.76       | 4.79       | -0.03             |
| EOM-pCCD-CCS   | 4.79       | 4.83       | -0.04             |
| EOM-pCCD-LCCSD | 2.79       | 2.94       | -0.15             |
| EOM-CCSD       | 2.47       | 2.74       | -0.27             |
| CR-EOM-CCSD(T) | 2.59       | 2.74       | -0.12             |
|                | $b_1$      |            |                   |
| EOM-pCCD+S     | 5.90       | 5.90       | $\pm 0.00$        |
| EOM-pCCD-CCS   | 5.94       | 5.93       | +0.01             |
| EOM-pCCD-LCCSD | 3.82       | 3.96       | -0.14             |
| EOM-CCSD       | 3.48       | 3.96       | -0.48             |
| CR-EOM-CCSD(T) | 3.62       | 3.99       | -0.31             |
|                | $a_2$      |            |                   |
| EOM-pCCD+S     | 6.15       | 6.15       | $\pm 0.00$        |
| EOM-pCCD-CCS   | 6.18       | 6.18       | $\pm 0.00$        |
| EOM-pCCD-LCCSD | 4.23       | 4.31       | -0.10             |
| EOM-CCSD       | 3.88       | 4.14       | -0.26             |
| CR-EOM-CCSD(T) | 4.00       | 4.13       | -0.13             |



## S9 Example results for all tested EOM-CC methods with imposed $D_{2h}$ symmetry

### S9.1 $\text{UO}_2^{2+}$

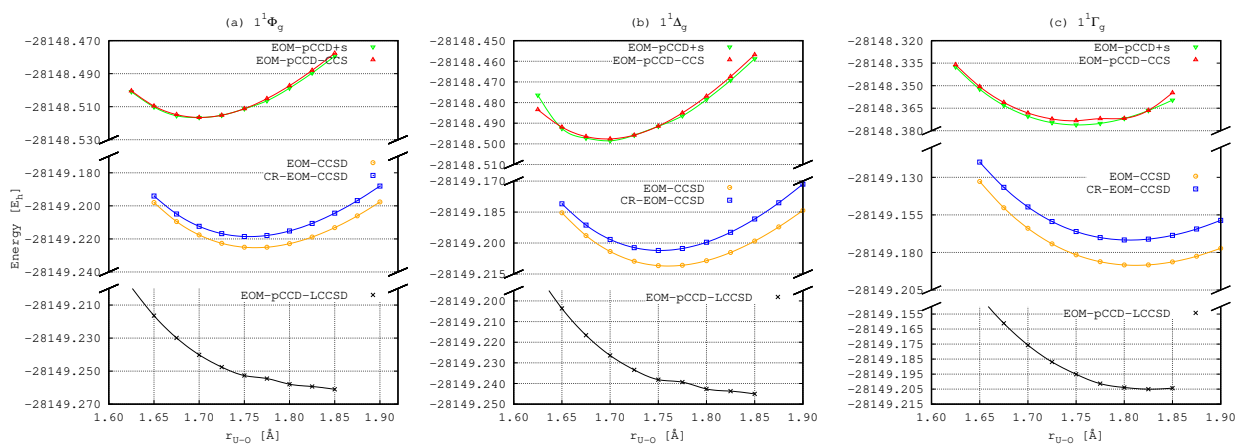

Figure S7: Potential energy surfaces of the lowest-lying excited states of  $\text{UO}_2^{2+}$  determined for various EOM-CC methods with imposed  $D_{2h}$  symmetry.

Table S20: Total electronic energies [ $E_h$ ] of  $\text{UO}_2^{2+}$  for different states and various CC methods. All EOM-CC methods are calculated with imposed  $D_{2h}$  symmetry.

| Distance[Å]   | pCCD         | pCCD-CCS     | pCCD-LCCSD     | CCSD            |                |
|---------------|--------------|--------------|----------------|-----------------|----------------|
| 1.600         | -28148.67865 | -28148.67861 |                |                 |                |
| 1.625         | -28148.68626 | -28148.68623 | -28149.36515   |                 |                |
| 1.650         | -28148.68938 | -28148.68934 | -28149.37486   | -28149.35230585 |                |
| 1.675         | -28148.68862 | -28148.68858 | -28149.38108   | -28149.35605907 |                |
| 1.700         | -28148.68454 | -28148.68448 | -28149.38437   | -28149.35640687 |                |
| 1.725         | -28148.67758 | -28148.67751 | -28149.38519   | -28149.35378603 |                |
| 1.750         | -28148.66819 | -28148.66811 | -28149.38399   | -28149.34857922 |                |
| 1.775         | -28148.65668 | -28148.65658 | -28149.37962   | -28149.34111895 |                |
| 1.800         | -28148.64333 | -28148.64322 | -28149.37726   | -28149.33170396 |                |
| 1.825         | -28148.62840 | -28148.62828 | -28149.37293   | -28149.32059737 |                |
| 1.850         | -28148.61215 | -28148.61200 | -28149.36891   | -28149.3080368  |                |
| 1.875         |              |              |                | -28149.2942417  |                |
| 1.900         |              |              |                | -28149.2794163  |                |
| Distance[Å]   | EOM-pCCD+S   | EOM-pCCD-CCS | EOM-pCCD-LCCSD | EOM-CCSD        | CR-EOM-CCSD(T) |
| $1^1\Sigma^+$ |              |              |                |                 |                |
| 1.600         |              |              |                |                 |                |
| 1.625         | -28148.50097 | -28148.50042 | -28149.19921   |                 |                |
| 1.650         | -28148.51019 | -28148.50957 | -28149.21639   | -28149.19797    | -28149.19402   |
| 1.675         | -28148.51552 | -28148.51480 | -28149.22989   | -28149.20950    | -28149.20492   |
| 1.700         | -28148.51657 | -28148.51651 | -28149.24014   | -28149.21760    | -28149.21238   |
| 1.725         | -28148.51523 | -28148.51516 | -28149.24757   | -28149.22266    | -28149.21680   |
| 1.750         | -28148.51132 | -28148.51124 | -28149.25268   | -28149.22503    | -28149.21855   |
| 1.775         | -28148.50644 | -28148.50514 | -28149.25450   | -28149.22501    | -28149.21791   |
| 1.800         | -28148.49876 | -28148.49729 | -28149.25791   | -28149.22288    | -28149.21519   |
| 1.825         | -28148.48963 | -28148.48801 | -28149.25932   | -28149.21886    | -28149.21061   |
| 1.850         | -28148.47940 | -28148.47763 | -28149.26099   | -28149.21318    | -28149.20442   |
| 1.875         |              |              |                | -28149.20605    | -28149.19682   |
| 1.900         |              |              |                | -28149.19764    | -28149.18803   |
| $1^1\Delta_g$ |              |              |                |                 |                |
| 1.600         |              |              |                |                 |                |
| 1.625         | -28148.47640 | -28148.48343 | -28149.18705   | -28149.18534    | -28149.18099   |
| 1.650         | -28148.49255 | -28148.49188 | -28149.20365   | -28149.19639    | -28149.19131   |
| 1.675         | -28148.49724 | -28148.49646 | -28149.21663   | -28149.20409    | -28149.19825   |
| 1.700         | -28148.49851 | -28148.49759 | -28149.22641   | -28149.20883    | -28149.20224   |
| 1.725         | -28148.49582 | -28148.49576 | -28149.23340   | -28149.21095    | -28149.20360   |
| 1.750         | -28148.49150 | -28148.49142 | -28149.23813   | -28149.21077    | -28149.20264   |
| 1.775         | -28148.48645 | -28148.48501 | -28149.23933   | -28149.20855    | -28149.19962   |
| 1.800         | -28148.47854 | -28148.47692 | -28149.24263   | -28149.20457    | -28149.19479   |
| 1.825         | -28148.46922 | -28148.46742 | -28149.24370   | -28149.19904    | -28149.18835   |
| 1.850         | -28148.45879 | -28148.45682 | -28149.24504   | -28149.19219    | -28149.18051   |
| 1.875         |              |              |                | -28149.18424    | -28149.17147   |
| 1.900         |              |              |                |                 |                |
| $1^1\Gamma_g$ |              |              |                |                 |                |
| 1.600         |              |              |                |                 |                |
| 1.625         | -28148.33757 | -28148.33603 | -28149.12087   |                 |                |
| 1.650         | -28148.35233 | -28148.35061 | -28149.14308   | -28149.13276    | -28149.11986   |
| 1.675         | -28148.36310 | -28148.36116 | -28149.16118   | -28149.15023    | -28149.13666   |
| 1.700         | -28148.37038 | -28148.36819 | -28149.17567   | -28149.16393    | -28149.14970   |
| 1.725         | -28148.37467 | -28148.37218 | -28149.18688   | -28149.17426    | -28149.15940   |
| 1.750         | -28148.37615 | -28148.37392 | -28149.19510   | -28149.18158    | -28149.16609   |
| 1.775         | -28148.37513 | -28148.37198 | -28149.20134   | -28149.18617    | -28149.17010   |
| 1.800         | -28148.37187 | -28148.36860 | -28149.20390   | -28149.18833    | -28149.17169   |
| 1.825         | -28148.36659 | -28148.36285 | -28149.20503   | -28149.18829    | -28149.17112   |
| 1.850         | -28148.35960 | -28148.35474 | -28149.20433   | -28149.18628    | -28149.16862   |
| 1.875         |              |              |                | -28149.18252    | -28149.16439   |
| 1.900         |              |              |                | -28149.17722    | -28149.15863   |
| $2^1\Delta_g$ |              |              |                |                 |                |
| 1.600         |              |              |                |                 |                |
| 1.625         | -28148.32666 | -28148.32526 | -28149.11021   |                 |                |
| 1.650         | -28148.34395 | -28148.34244 | -28149.13284   | -28149.12248    | -28149.10936   |
| 1.675         | -28148.35743 | -28148.35553 | -28149.15131   | -28149.14030    | -28149.12658   |
| 1.700         | -28148.36528 | -28148.36313 | -28149.16609   | -28149.15429    | -28149.13998   |
| 1.725         | -28148.37009 | -28148.36765 | -28149.17756   | -28149.16483    | -28149.14996   |
| 1.750         | -28148.37207 | -28148.36932 | -28149.18598   | -28149.17227    | -28149.15689   |
| 1.775         | -28148.36628 | -28148.36368 | -28149.19296   | -28149.17692    | -28149.16109   |
| 1.800         | -28148.36501 | -28148.36213 | -28149.19516   | -28149.17904    | -28149.16282   |
| 1.825         | -28148.36152 | -28148.35836 | -28149.19643   | -28149.17886    | -28149.16234   |
| 1.850         | -28148.35740 | -28148.35239 | -28149.19588   | -28149.17660    | -28149.15989   |
| 1.875         |              |              |                | -28149.17245    | -28149.15569   |
| 1.900         |              |              |                | -28149.16661    | -28149.14995   |
| $2^1\Phi_g$   |              |              |                |                 |                |
| 1.600         |              |              |                |                 |                |
| 1.625         | -28148.36327 | -28148.36180 | -28149.13612   |                 |                |
| 1.650         | -28148.37639 | -28148.37474 | -28149.15661   | -28149.14656    | -28149.13402   |
| 1.675         | -28148.38559 | -28148.38373 | -28149.17309   | -28149.16223    | -28149.14898   |
| 1.700         | -28148.39131 | -28148.38921 | -28149.18600   | -28149.17423    | -28149.16029   |
| 1.725         | -28148.39405 | -28148.39165 | -28149.19569   | -28149.18294    | -28149.16834   |
| 1.750         | -28148.39134 | -28148.39126 | -28149.20244   | -28149.18873    | -28149.17349   |
| 1.775         | -28148.38844 | -28148.38834 | -28149.20610   | -28149.19188    | -28149.17604   |
| 1.800         | -28148.38657 | -28148.38318 | -28149.20843   | -28149.19269    | -28149.17628   |
| 1.825         | -28148.37976 | -28148.37604 | -28149.20830   | -28149.19138    | -28149.17443   |
| 1.850         | -28148.36722 | -28148.36708 | -28149.20643   | -28149.18818    | -28149.17074   |
| 1.875         |              |              |                | -28149.18331    | -28149.16539   |
| 1.900         |              |              |                | -28149.17696    | -28149.15860   |
| $1^1\Pi_g$    |              |              |                |                 |                |
| 1.600         |              |              |                |                 |                |
| 1.625         | -28148.35626 | -28148.35478 | -28149.13304   |                 |                |
| 1.650         | -28148.36945 | -28148.36780 | -28149.15346   | -28149.14364    | -28149.13121   |
| 1.675         | -28148.37873 | -28148.37686 | -28149.16986   | -28149.15927    | -28149.14615   |
| 1.700         | -28148.38454 | -28148.38242 | -28149.18268   | -28149.17123    | -28149.15742   |
| 1.725         | -28148.38735 | -28148.38494 | -28149.19225   | -28149.17990    | -28149.16544   |
| 1.750         | -28148.38470 | -28148.38462 | -28149.19887   | -28149.18564    | -28149.17055   |
| 1.775         | -28148.38189 | -28148.38179 | -28149.20113   | -28149.18876    | -28149.17306   |
| 1.800         | -28148.38015 | -28148.37673 | -28149.20455   | -28149.18952    | -28149.17326   |
| 1.825         | -28148.37345 | -28148.36969 | -28149.20421   | -28149.18817    | -28149.17138   |
| 1.850         | -28148.36099 | -28148.36085 | -28149.20210   | -28149.18494    | -28149.16765   |
| 1.875         |              |              |                | -28149.18004    | -28149.16229   |
| 1.900         |              |              |                | -28149.17369    | -28149.15548   |

## S10 Example results for all tested EOM-CC methods with imposed $C_{2v}$ symmetry

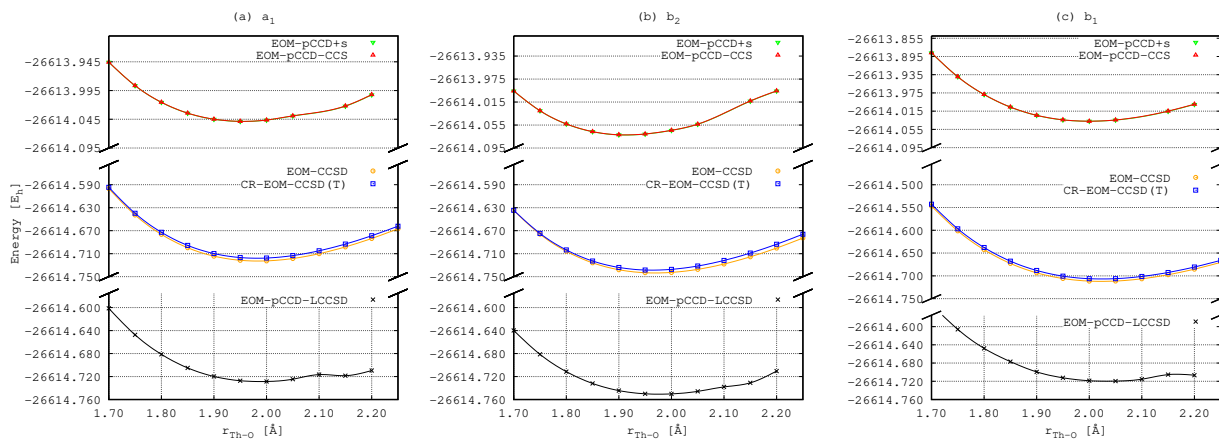

Figure S8: Potential energy surfaces of the lowest-lying excited states of  $\text{ThO}_2$  determined for various EOM-CC methods with imposed  $C_{2v}$  symmetry.

Table S21: Total electronic energies [ $E_h$ ] of ThO<sub>2</sub> for different states and various CC methods. All EOM-CC methods are calculated with imposed  $C_{2v}$  symmetry.

| Distance[Å] | pCCD         | pCCD-CCS     | pCCD-LCCSD     | CCSD         |                |
|-------------|--------------|--------------|----------------|--------------|----------------|
|             |              |              | $X^1\Sigma^+$  |              |                |
| 1.700       | -26614.15693 | -26614.15693 | -26614.75762   | -26614.74828 |                |
| 1.750       | -26614.19402 | -26614.19401 | -26614.79719   | -26614.78697 |                |
| 1.800       | -26614.21821 | -26614.21821 | -26614.82420   | -26614.81288 |                |
| 1.850       | -26614.23164 | -26614.23163 | -26614.84090   | -26614.82817 |                |
| 1.900       | -26614.23606 | -26614.23606 | -26614.84900   | -26614.83463 |                |
| 1.950       | -26614.23303 | -26614.23302 | -26614.85042   | -26614.83378 |                |
| 2.000       | -26614.22384 | -26614.22383 | -26614.84663   | -26614.82689 |                |
| 2.050       | -26614.20947 | -26614.20947 | -26614.83949   | -26614.81505 |                |
| 2.100       |              |              | -26614.83394   | -26614.79921 |                |
| 2.150       | -26614.16884 | -26614.16883 | -26614.83187   | -26614.78017 |                |
| 2.200       | -26614.14410 | -26614.14409 | -26614.76551   | -26614.75860 |                |
| 2.250       |              |              |                | -26614.73509 |                |
| Distance[Å] | EOM-pCCD+S   | EOM-pCCD-CCS | EOM-pCCD-LCCSD | EOM-CCSD     | CR-EOM-CCSD(T) |
|             |              |              | $a_1$          |              |                |
| 1.700       | -26613.94573 | -26613.94555 | -26614.60135   | -26614.59677 | -26614.59453   |
| 1.750       | -26613.98642 | -26613.98642 | -26614.64742   | -26614.64269 | -26614.63972   |
| 1.800       | -26614.01553 | -26614.01533 | -26614.68133   | -26614.67638 | -26614.67279   |
| 1.850       | -26614.03441 | -26614.03420 | -26614.70500   | -26614.69973 | -26614.69564   |
| 1.900       | -26614.04501 | -26614.04478 | -26614.71987   | -26614.71433 | -26614.70984   |
| 1.950       | -26614.04875 | -26614.04851 | -26614.72723   | -26614.72154 | -26614.71676   |
| 2.000       | -26614.04650 | -26614.04624 | -26614.72863   | -26614.72256 | -26614.71759   |
| 2.050       | -26614.03933 | -26614.03903 | -26614.72460   | -26614.71843 | -26614.71336   |
| 2.100       |              |              | -26614.71661   | -26614.71006 | -26614.70498   |
| 2.150       | -26614.02219 | -26614.02180 | -26614.71847   | -26614.69823 | -26614.69323   |
| 2.200       | -26614.00257 | -26614.00211 | -26614.70954   | -26614.68361 | -26614.67878   |
| 2.250       |              |              |                | -26614.66675 | -26614.66220   |
|             |              |              | $b_2$          |              |                |
| 1.700       | -26613.99584 | -26613.99571 | -26614.63981   | -26614.63485 | -26614.63453   |
| 1.750       | -26614.03016 | -26614.03015 | -26614.68137   | -26614.67610 | -26614.67476   |
| 1.800       | -26614.05323 | -26614.05306 | -26614.71146   | -26614.70585 | -26614.70354   |
| 1.850       | -26614.06664 | -26614.06646 | -26614.73202   | -26614.72597 | -26614.72277   |
| 1.900       | -26614.07217 | -26614.07196 | -26614.74447   | -26614.73798 | -26614.73398   |
| 1.950       | -26614.07076 | -26614.07053 | -26614.75003   | -26614.74317 | -26614.73846   |
| 2.000       | -26614.06442 | -26614.06416 | -26614.75018   | -26614.74264 | -26614.73731   |
| 2.050       | -26614.05374 | -26614.05344 | -26614.74578   | -26614.73732 | -26614.73148   |
| 2.100       |              |              | -26614.73808   | -26614.72803 | -26614.72180   |
| 2.150       | -26614.01341 | -26614.01304 | -26614.73097   | -26614.71548 | -26614.70896   |
| 2.200       | -26613.99594 | -26613.99551 | -26614.71045   | -26614.70025 | -26614.69358   |
| 2.250       |              |              |                | -26614.68285 | -26614.67617   |
|             |              |              | $b_1$          |              |                |
| 1.700       | -26613.88716 | -26613.88696 | -26614.55140   | -26614.54684 | -26614.54280   |
| 1.750       | -26613.93955 | -26613.93955 | -26614.60606   | -26614.60128 | -26614.59677   |
| 1.800       | -26613.97856 | -26613.97833 | -26614.64771   | -26614.64262 | -26614.63779   |
| 1.850       | -26614.00618 | -26614.00594 | -26614.67681   | -26614.67276 | -26614.66770   |
| 1.900       | -26614.02427 | -26614.02401 | -26614.69934   | -26614.69335 | -26614.68815   |
| 1.950       | -26614.03421 | -26614.03393 | -26614.71233   | -26614.70584 | -26614.70057   |
| 2.000       | -26614.03702 | -26614.03702 | -26614.71875   | -26614.71148 | -26614.70621   |
| 2.050       | -26614.03459 | -26614.03424 | -26614.71958   | -26614.71137 | -26614.70614   |
| 2.100       |              |              | -26614.71538   | -26614.70644 | -26614.70131   |
| 2.150       | -26614.01525 | -26614.01480 | -26614.70534   | -26614.69753 | -26614.69256   |
| 2.200       | -26614.00025 | -26613.99973 | -26614.70666   | -26614.68533 | -26614.68058   |
| 2.250       |              |              |                | -26614.67046 | -26614.66601   |
|             |              |              | $a_2$          |              |                |
| 1.700       | -26613.94188 | -26613.94175 | -26614.58280   | -26614.57791 | -26614.57731   |
| 1.750       | -26613.97658 | -26613.97658 | -26614.62467   | -26614.61954 | -26614.61798   |
| 1.800       | -26614.00035 | -26614.00018 | -26614.65537   | -26614.65002 | -26614.64759   |
| 1.850       | -26614.01474 | -26614.01456 | -26614.67829   | -26614.67119 | -26614.66800   |
| 1.900       | -26614.02156 | -26614.02135 | -26614.69028   | -26614.68453 | -26614.68069   |
| 1.950       | -26614.02166 | -26614.02142 | -26614.69721   | -26614.69127 | -26614.68691   |
| 2.000       | -26614.01714 | -26614.01686 | -26614.69865   | -26614.69248 | -26614.68772   |
| 2.050       | -26614.00845 | -26614.00814 | -26614.69940   | -26614.68938 | -26614.68438   |
| 2.100       |              |              | -26614.69943   | -26614.68573 | -26614.68092   |
| 2.150       | -26613.97251 | -26613.97211 | -26614.69484   | -26614.67863 | -26614.67405   |
| 2.200       | -26613.95817 | -26613.95769 | -26614.67439   | -26614.66802 | -26614.66374   |
| 2.250       |              |              |                | -26614.65455 | -26614.65062   |

## S11 Total CPU timing

TableS22: Total timings (in seconds [s]) for different EOM-CC methods. Please note that all the excited state calculations were performed on different computing nodes and using different software packages and optimization parameters (like,  $C_1$  or  $D_{2h}$  point group symmetry). Thus, these timings are very approximate and should be considered with caution\*.

| Molecule                      | PIERNIK    |              |                | NWCHEM* (version 6.8)        | MOLPRO2012 |
|-------------------------------|------------|--------------|----------------|------------------------------|------------|
|                               | EOM-pCCD+S | EOM-pCCD-CCS | EOM-pCCD-LCCSD | EOM-CCSD<br>+ CR-EOM-CCSD(T) | FCIDUMP    |
| ThO                           | 173        | 262          | 9'459          | 24'501                       | 188        |
| ThS                           | 174        | 254          | 7'669          | 30'936                       | 342        |
| ThO <sub>2</sub>              | 233        | 221          | 36'836         | 8'349                        | 74         |
| NUN                           | 91         | 166          | 4'510          | 6'576                        | 35         |
| UO <sub>2</sub> <sup>2+</sup> | 85         | 146          | 6'642          | 10'121                       | 35         |
| PaO <sub>2</sub> <sup>+</sup> | 89         | 192          | 6'985          | 6'633                        | 35         |
| CUO                           | 66         | 140          | 3'426          | 6'785                        | 45         |
| NUO <sup>+</sup>              | 66         | 137          | 5'252          | 10'029                       | 47         |

\*Specifically, the EOM-CCSD and CR-EOM-CCSD(T) calculations in NWCHEM benefit from the  $D_{2h}$  and  $C_{2v}$  point group symmetries, while all the calculations in PIERNIK do either not fully exploit the symmetry or have been done relaxing to  $C_1$  point group symmetry. The NWCHEM code is written in modern C++/Fortran languages and is fully optimized. The PIERNIK code is written mainly in Python, where only some few bottleneck operations have been exported to C++, and is not fully optimized, yet. Note that the Davidson diagonalization in PIERNIK is fully implemented in Python. Finally, the results for NWCHEM correspond to 5-7 excited states in one irreducible representation, while in PIERNIK up to 15-20 lowest-lying excited states have been targeted in total.

## S12 Experimental reference data

TableS23: Experimental spectroscopic parameters of the ground and some low-lying singlet excited states of ThO,<sup>10,11</sup> ThS,<sup>12</sup> NUN,<sup>13</sup> and ThO<sub>2</sub>.<sup>14</sup>  $r_e$  is the equilibrium bond length,  $\omega_e$  the harmonic vibrational frequency, and  $T_v$  the excitation energy, respectively.

| ThO              |           |                                |            | ThS              |           |                                |            |
|------------------|-----------|--------------------------------|------------|------------------|-----------|--------------------------------|------------|
| State            | $r_e$ [Å] | $\omega_e$ [cm <sup>-1</sup> ] | $T_v$ [eV] | State            | $r_e$ [Å] | $\omega_e$ [cm <sup>-1</sup> ] | $T_v$ [eV] |
| X <sup>1</sup> Σ | 1.840     | 896                            |            | X <sup>1</sup> Σ |           | 475                            |            |
| 1 <sup>1</sup> Δ | 1.881     | 816                            | 2.23       |                  |           |                                |            |
| 1 <sup>1</sup> Σ | 1.867     | 846                            | 1.31       |                  |           |                                |            |
| 1 <sup>1</sup> Π | 1.864     | 843                            | 1.38       |                  |           |                                |            |

---

| NUN                           |           |                                |            | ThO <sub>2</sub>               |           |                                |            |
|-------------------------------|-----------|--------------------------------|------------|--------------------------------|-----------|--------------------------------|------------|
| State                         | $r_e$ [Å] | $\omega_e$ [cm <sup>-1</sup> ] | $T_v$ [eV] | State                          | $r_e$ [Å] | $\omega_e$ [cm <sup>-1</sup> ] | $T_v$ [eV] |
| X <sup>1</sup> Σ <sub>g</sub> |           | 1008                           |            | X <sup>1</sup> 1A <sub>1</sub> |           | 808                            |            |
|                               |           |                                |            | B <sub>2</sub>                 |           | 757                            |            |

## References

- [1] B. O. Roos, R. Lindh, P.-A. k. Malmqvist, V. Veryazov and P.-O. Widmark, *Chem. Phys. Lett.*, 2005, **409**, 295–299.
- [2] F. Aquilante, J. Autschbach, R.K. Carlson, L.F. Chibotaru, M.G. Delcey, L. De Vico, I. Fdez. Galván, N. Ferré, L.M. Frutos, L. Gagliardi, M. Garavelli, A. Giussani, C.E. Hoyer *et al.*, *J. Comput. Chem.*, 2016, **37**, 506–541.
- [3] N. Douglas and N. M. Kroll, *Ann. Phys.*, 1974, **82**, 89–155.
- [4] B. A. Hess, *Phys. Rev. A*, 1986, **33**, 3742–3748.
- [5] M. Reiher and A. Wolf, *Relativistic Quantum Chemistry. The Fundamental Theory of Molecular Science*, Wiley, 2009.
- [6] K. A. Peterson, *J. Chem. Phys.*, 2015, **142**, 074105.
- [7] M. Reiher and A. Wolf, *J. Chem. Phys.*, 2004, **121**, 2037–2047.
- [8] M. Reiher and A. Wolf, *J. Chem. Phys.*, 2004, **121**, 10945–10956.
- [9] T. Dunning Jr., *J. Chem. Phys.*, 1989, **90**, 1007–1023.
- [10] V. Goncharov and M. C. Heaven, *J. Chem. Phys.*, 2006, **124**, 064312.
- [11] T. Wentink and R. J. Spindler, *Journal of Quantitative Spectroscopy and Radiative Transfer*, 1972, **12**, 1569 – 1590.
- [12] J. H. Bartlett, I. O. Antonov and M. C. Heaven, *J. Phys. Chem. A*, 2013, **117**, 12042–12048.
- [13] R. D. Hunt, J. T. Yustein and L. Andrews, *J. Chem. Phys.*, 1993, **98**, 6070.
- [14] M. Idiri, T. Le Bihan, S. Heathman and J. Rebizant, *Phys. Rev. B*, 2004, **70**, 014113.
